# Supplementary material
Source: publisher figshare collection journal article supplement (https://acs.figshare.com/ndownloader/files/16106861)
Supplement: Supplementary file 1 [file 16106861]

## Synthesis of Cryptophane-223 Type Derivatives with dual functionalization

Orsola Baydoun,<sup>†</sup> Nicolas De Rycke,<sup>†</sup> Estelle Léonce,<sup>‡</sup> Céline Boutin,<sup>‡</sup> Patrick Berthault,<sup>‡</sup>  
Erwann Jeanneau <sup>§</sup>, Thierry Brotin,<sup>\*,†</sup>

<sup>†</sup> Univ Lyon, Ens de Lyon, CNRS UMR 5182, Université Claude Bernard Lyon 1, Laboratoire de Chimie, F69342, Lyon, France

<sup>‡</sup> Laboratoire Structure et Dynamique par Résonance Magnétique, CEA Saclay, IRAMIS, NIMBE UMR CEA/CNRS 3685, 91191 Gif sur Yvette, France.

<sup>§</sup> Centre de Diffractométrie Henri Longchambon, Université Lyon 1, 5 rue de la Doua, 69100 Villeurbanne, France.

S4: <sup>1</sup>H NMR (400 MHz) spectrum of compound **4** recorded in CDCl<sub>3</sub> at 298 K.

S5: <sup>13</sup>C NMR (100.6 MHz) spectrum of compound **4** recorded in CDCl<sub>3</sub> at 298 K.

S6: <sup>1</sup>H NMR (400 MHz) spectrum of CTB **5** recorded in CDCl<sub>3</sub> at 298 K.

S7: <sup>13</sup>C NMR (100.6 MHz) spectrum of CTB **5** recorded in CDCl<sub>3</sub> at 298 K.

S8: <sup>1</sup>H NMR (400 MHz) spectrum of CTB **7** recorded in CDCl<sub>3</sub> at 298 K.

S9: <sup>13</sup>C NMR (100.6 MHz) spectrum of CTB **7** recorded in CDCl<sub>3</sub> at 298 K.

S10: <sup>1</sup>H NMR (400 MHz) spectrum of compound **8** recorded in CDCl<sub>3</sub> at 298 K.

S11: <sup>13</sup>C NMR (100.6 MHz) spectrum of compound **8** recorded in CDCl<sub>3</sub> at 298 K.

S12: <sup>1</sup>H NMR (400 MHz) spectrum of compound **9** recorded in CDCl<sub>3</sub> at 298 K.

S13: <sup>13</sup>C NMR (100.6 MHz) spectrum of compound **9** recorded in CDCl<sub>3</sub> at 298 K.

S14: <sup>1</sup>H NMR (400 MHz) spectrum of compound **10** recorded in CDCl<sub>3</sub> at 298 K.

S15: <sup>13</sup>C NMR (100.6 MHz) spectrum of compound **10** recorded in CDCl<sub>3</sub> at 298 K.

S16: <sup>1</sup>H NMR (400 MHz) spectrum of compound **11** recorded in DMSO-*d*<sub>6</sub> at 298 K.

S17: <sup>13</sup>C NMR (100.6 MHz) spectrum of compound **11** recorded in DMSO-*d*<sub>6</sub> at 298K.

S18:  $^1\text{H}$  NMR (400 MHz) spectrum of compound **14** recorded in  $\text{CDCl}_3$  at 298 K.

S19:  $^{13}\text{C}$  NMR (100.6 MHz) spectrum of compound **14** recorded in  $\text{CDCl}_3$  at 298 K.

S20: HSQC (400 MHz) spectrum of compound **14** recorded in  $\text{CDCl}_3$  at 298 K.

S21:  $^1\text{H}$  NMR (400 MHz) spectrum of compound **15** recorded in  $\text{CDCl}_3$  at 298 K.

S22:  $^{13}\text{C}$  NMR (100.6 MHz) spectrum of compound **15** recorded in  $\text{CDCl}_3$  at 298 K.

S23: HSQC (400 MHz) spectrum of compound **15** recorded in  $\text{CDCl}_3$  at 298 K.

S24:  $^1\text{H}$  NMR (400 MHz) spectrum of compound **18** recorded in  $\text{CDCl}_3$  at 298 K.

S25:  $^{13}\text{C}$  NMR (100.6 MHz) spectrum of compound **18** recorded in  $\text{CDCl}_3$  at 298 K.

S26: HSQC (400 MHz) spectrum of compound **18** recorded in  $\text{CDCl}_3$  at 298 K.

S27:  $^1\text{H}$  NMR (400 MHz) spectrum of compound **19** recorded in  $\text{CDCl}_3$  at 298 K.

S28:  $^{13}\text{C}$  NMR (100.6 MHz) spectrum of compound **19** recorded in  $\text{CDCl}_3$  at 298 K.

S29: HSQC (400 MHz) spectrum of compound **19** recorded in  $\text{CDCl}_3$  at 298 K.

S30:  $^1\text{H}$  NMR (400 MHz) spectrum of compound **21** recorded in  $\text{CDCl}_3$  at 298 K.

S31:  $^{13}\text{C}$  NMR (100.6 MHz) spectrum of compound **21** recorded in  $\text{CDCl}_3$  at 298 K.

S32: HSQC (400 MHz) spectrum of compound **21** recorded in  $\text{CDCl}_3$  at 298 K.

S33:  $^1\text{H}$  NMR (400 MHz) spectrum of compound **2** recorded in  $\text{DMSO}-d_6$  at 298 K.

S34:  $^{13}\text{C}$  NMR (100.6 MHz) spectrum of compound **2** recorded in  $\text{DMSO}-d_6$  at 298 K.

S35: HSQC (400 MHz) spectrum of compound **2** recorded in  $\text{DMSO}-d_6$  at 298 K.

S36: COSY (400 MHz) spectrum of compound **2** recorded in  $\text{DMSO}-d_6$  at 298 K.

S37:  $^1\text{H}$  NMR (400 MHz) spectrum of compound **23** recorded in  $\text{CDCl}_3$  at 298 K.

S38:  $^{13}\text{C}$  NMR (100.6 MHz) spectrum of compound **23** recorded in  $\text{CDCl}_3$  at 298 K.

S39: HSQC (400 MHz) spectrum of compound **23** recorded in  $\text{CDCl}_3$  at 298 K.

S40: ORTEP representation of compound **9** (hydrogen atoms and solvent molecule were omitted for clarity. The displacement ellipsoids were plotted at 30% probability level).

S41: Calorimetric titration of compound **2** in  $\text{H}_2\text{O}$ /TRIS (20 mM; pH = 7.6). The solution host ( $c = 0.08$  mM) was placed into the calorimeter cell (1.4 mL) and 28 successive aliquots (10  $\mu\text{L}$ ) of  $\text{Ni}^{2+}$  solution ( $c = 1.0$  mM) were added at 3 min intervals.

S42: Calorimetric titration of Cryptophane-222 hexacarboxylate in H<sub>2</sub>O/TRIS (20 mM; pH = 7.0). The solution host (c = 0.08 mM) was placed into the calorimeter cell (1.4 mL) and 28 successive aliquots (10 µL) of Ni<sup>2+</sup> solution (c = 1.0 mM) were added at 3 min intervals.

S43: Hyperpolarized <sup>129</sup>Xe spectra of compound **2** in TRIS buffer (20 mM, pH = 7.5). a) in absence of Zn<sup>2+</sup> (green spectrum). b) in presence of 1 equiv. of Zn<sup>2+</sup> (blue spectrum). c) in presence of 5 equiv. of Zn<sup>2+</sup> (red spectrum). Spectra recorded at 25°C.

S44: hyperpolarized <sup>129</sup>Xe NMR spectrum of compound **10** recorded at 298 K in C<sub>2</sub>D<sub>2</sub>Cl<sub>4</sub>.

Table S1: Crystallographic data of cryptophane **9**.

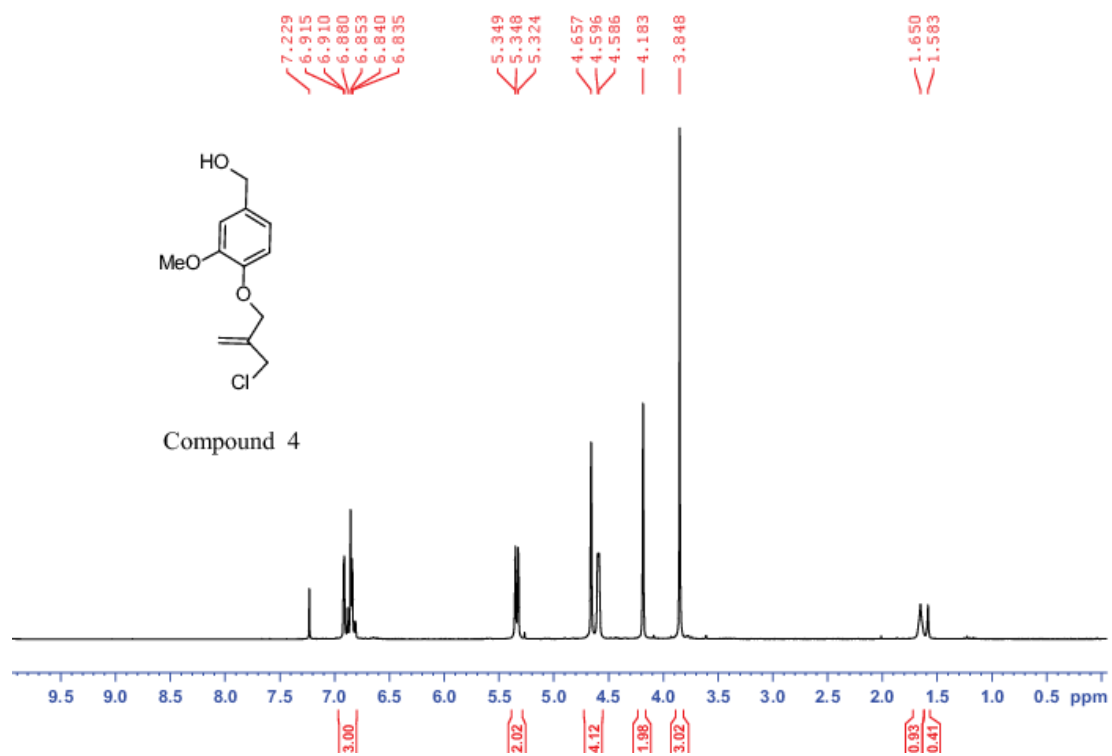

Figure S1: <sup>1</sup>H NMR (400 MHz) spectrum of compound **4** recorded in CDCl<sub>3</sub> at 298 K.

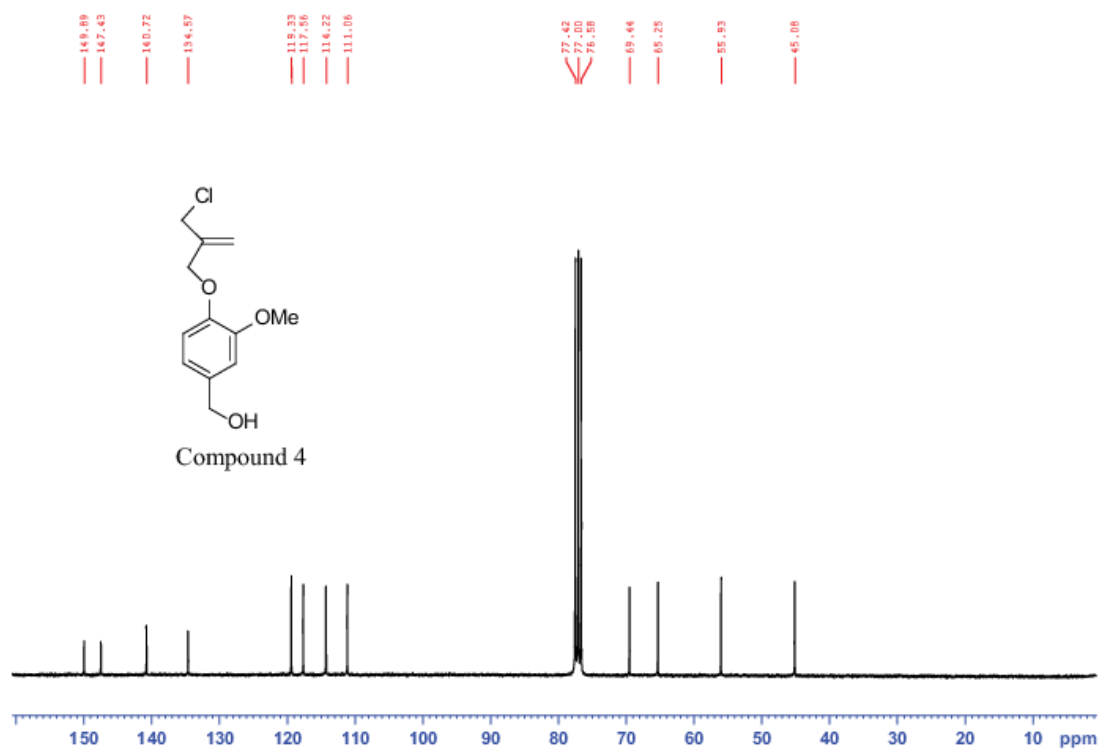

Figure S2: <sup>13</sup>C NMR (100.6 MHz) spectrum of compound **4** recorded in CDCl<sub>3</sub> at 298 K.

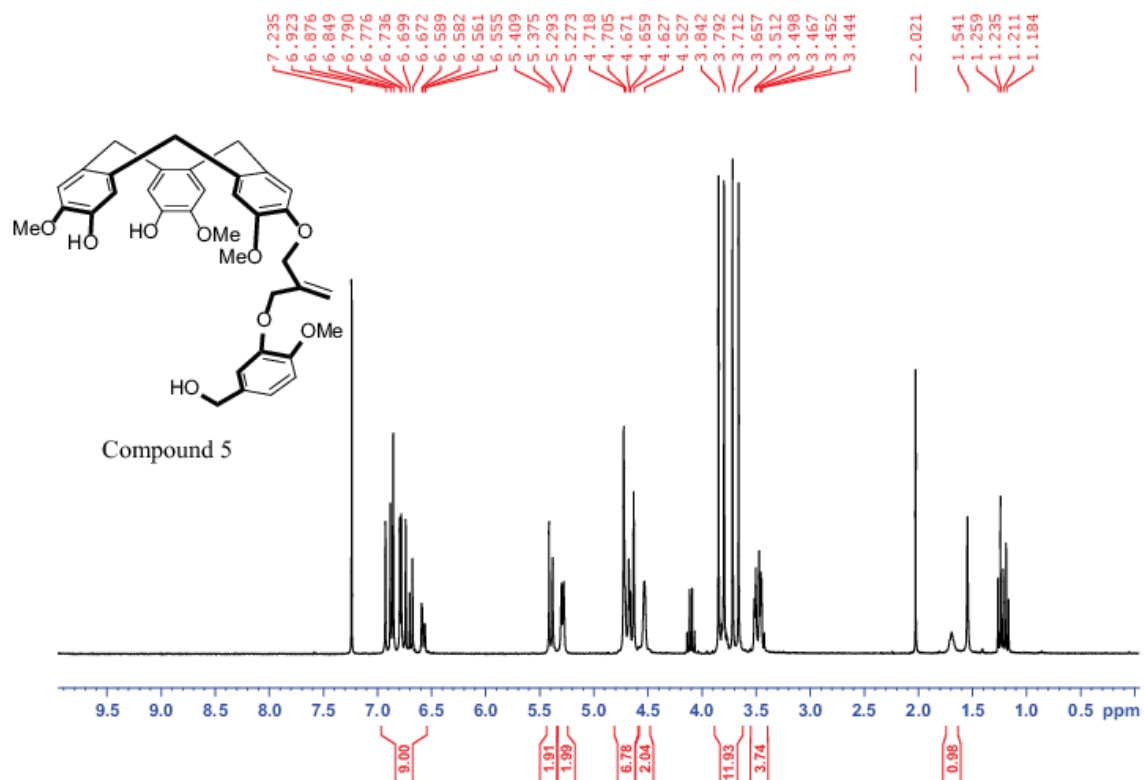

Figure S3:  $^1\text{H}$  NMR (400 MHz) spectrum of CTB **5** recorded in  $\text{CDCl}_3$  at 298 K.

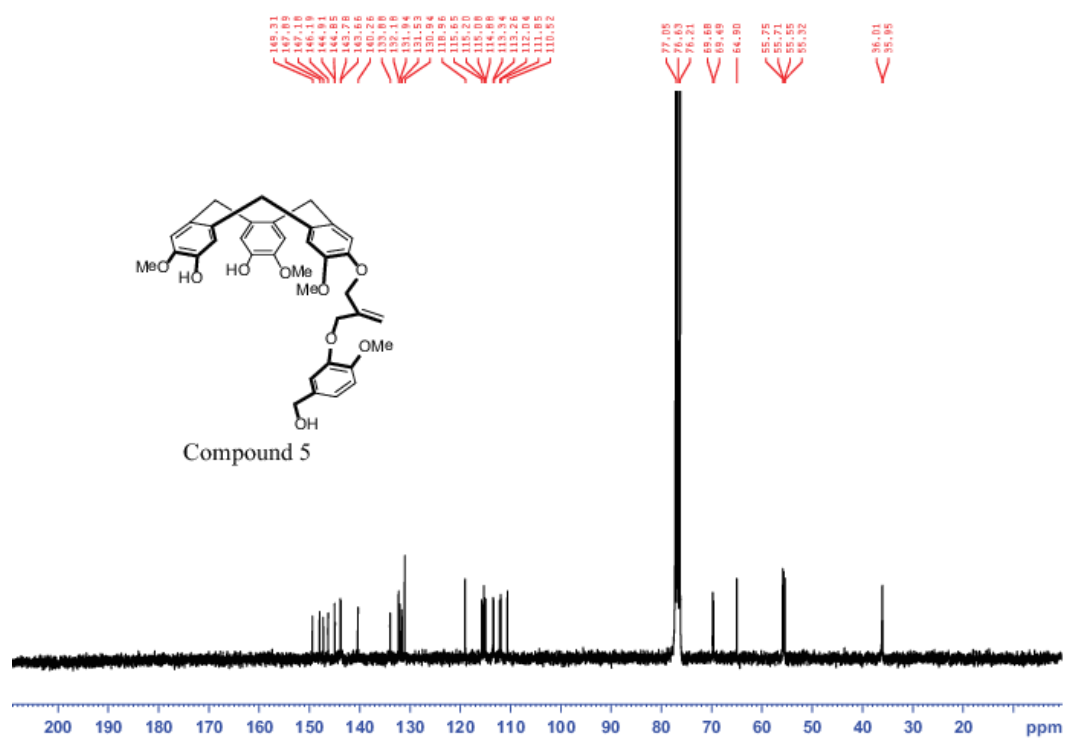

Figure S4:  $^{13}\text{C}$  NMR (100.6 MHz) spectrum of CTB **5** recorded in  $\text{CDCl}_3$  at 298 K.

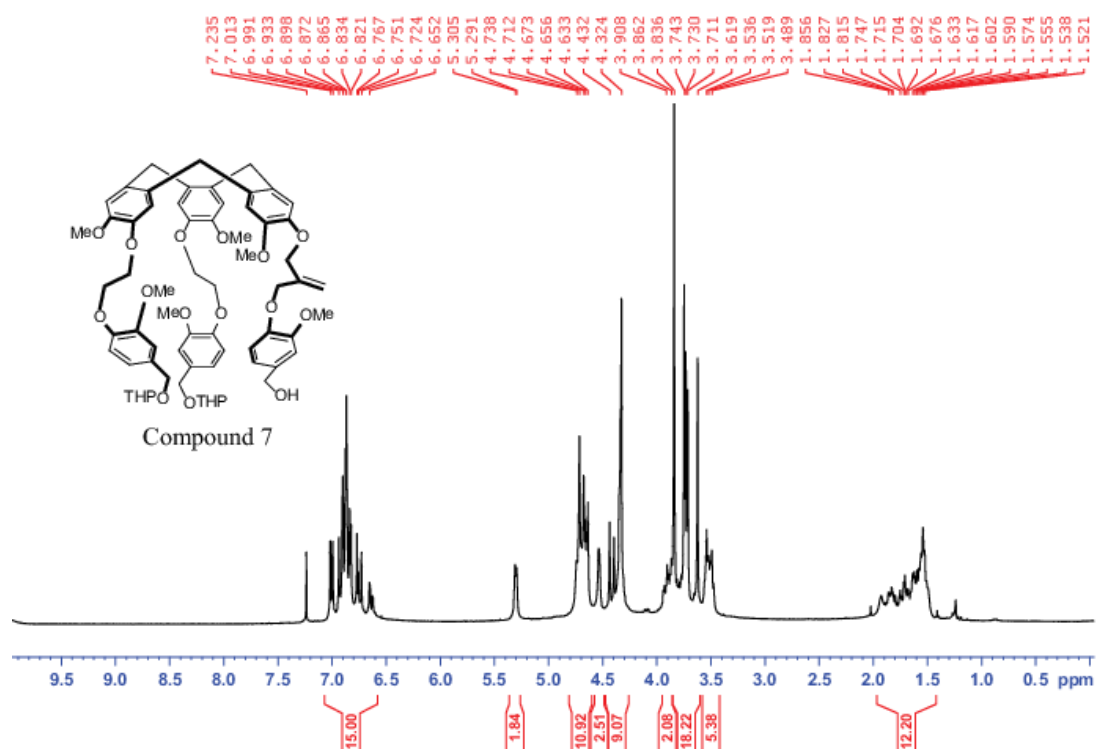

Figure S5:  $^1\text{H}$  NMR (400 MHz) spectrum of CTB **7** recorded in  $\text{CDCl}_3$  at 298 K.



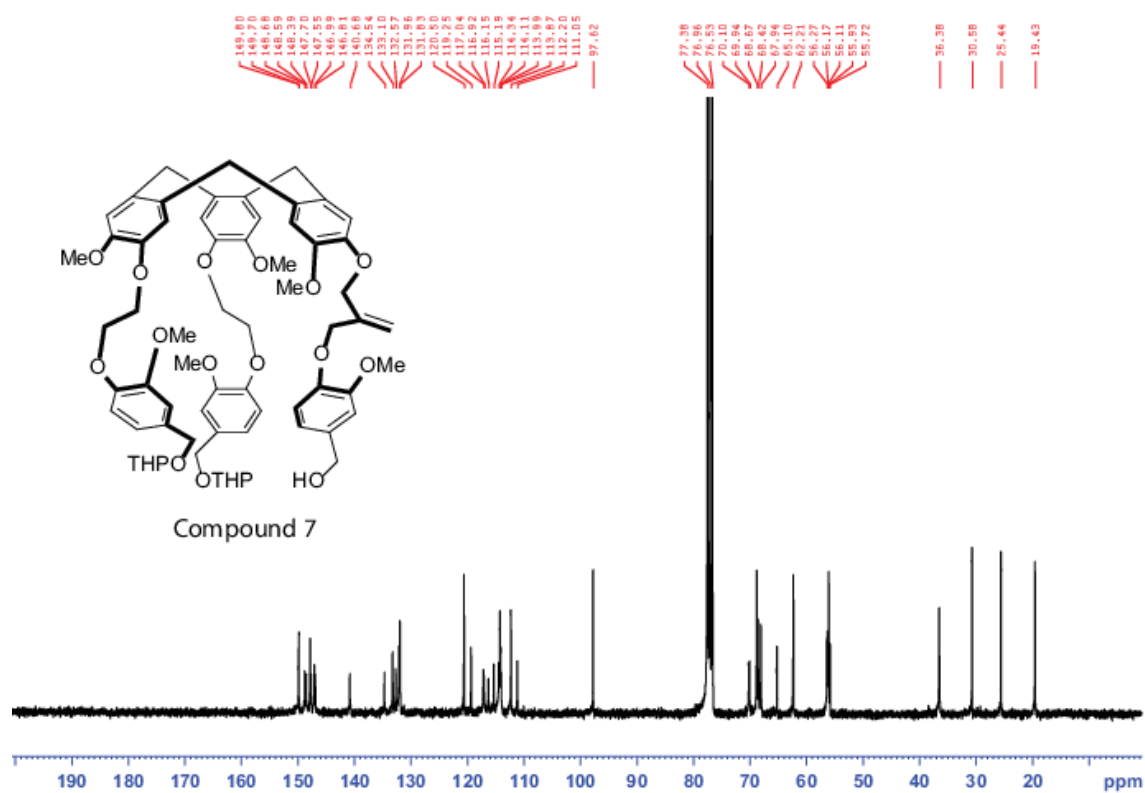

Figure S6:  $^{13}\text{C}$  NMR (100.6 MHz) spectrum of CTB **7** recorded in  $\text{CDCl}_3$  at 298 K.

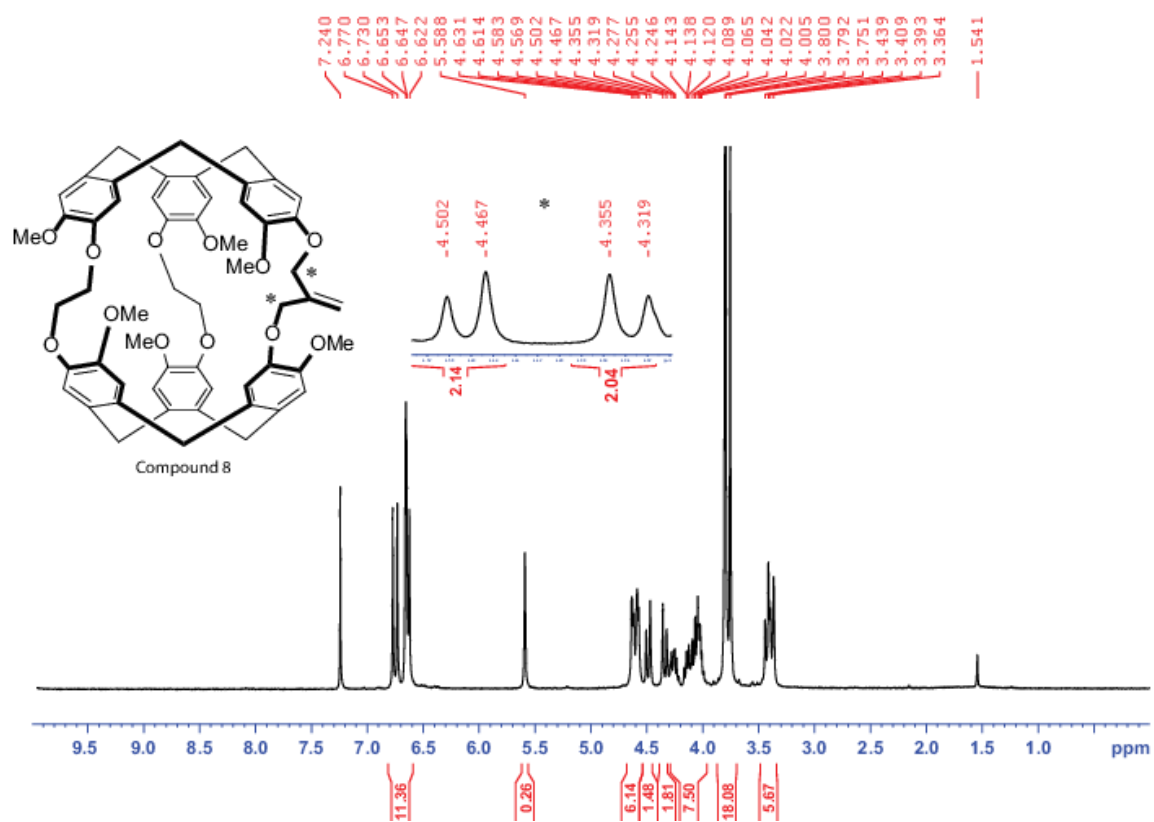

Figure S7:  $^1\text{H}$  NMR (400 MHz) spectrum of compound **8** recorded in  $\text{CDCl}_3$  at 298 K.

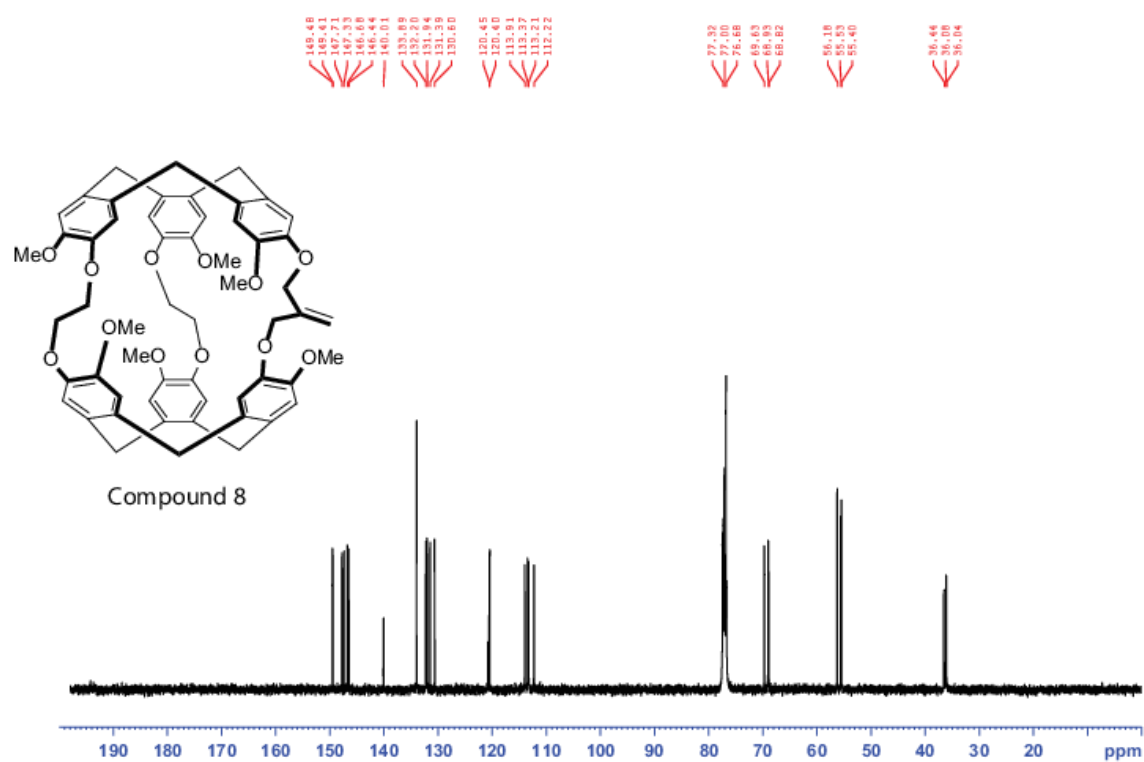

Figure S8:  $^{13}\text{C}$  NMR (100.6 MHz) spectrum of compound **8** recorded in  $\text{CDCl}_3$  at 298 K.

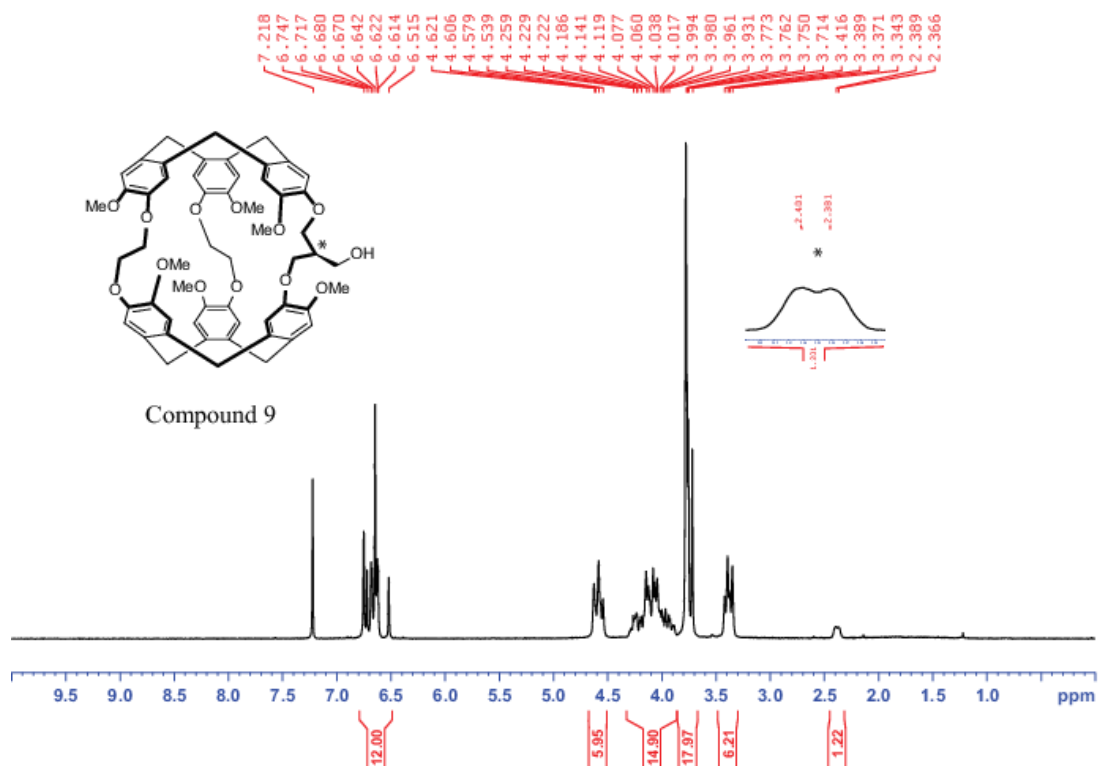

Figure S9:  $^1\text{H}$  NMR (400 MHz) spectrum of compound **9** recorded in  $\text{CDCl}_3$  at 298 K.

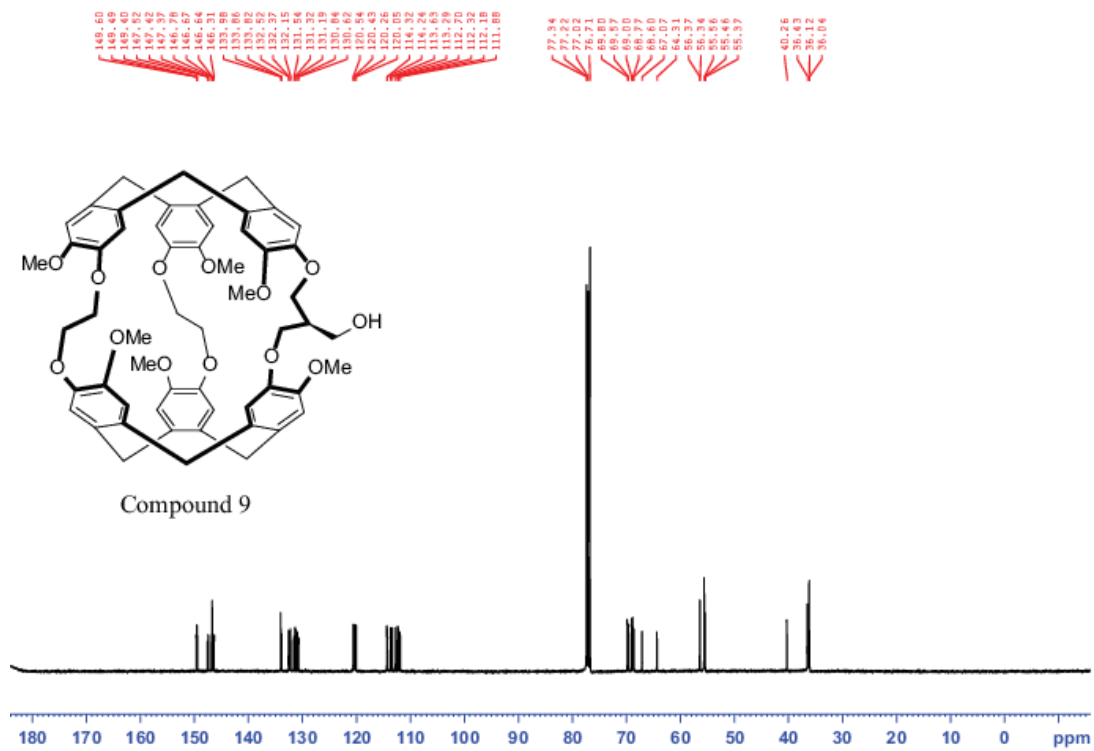

Figure S10:  $^{13}\text{C}$  NMR (100.6 MHz) spectrum of compound **9** recorded in  $\text{CDCl}_3$  at 298 K.

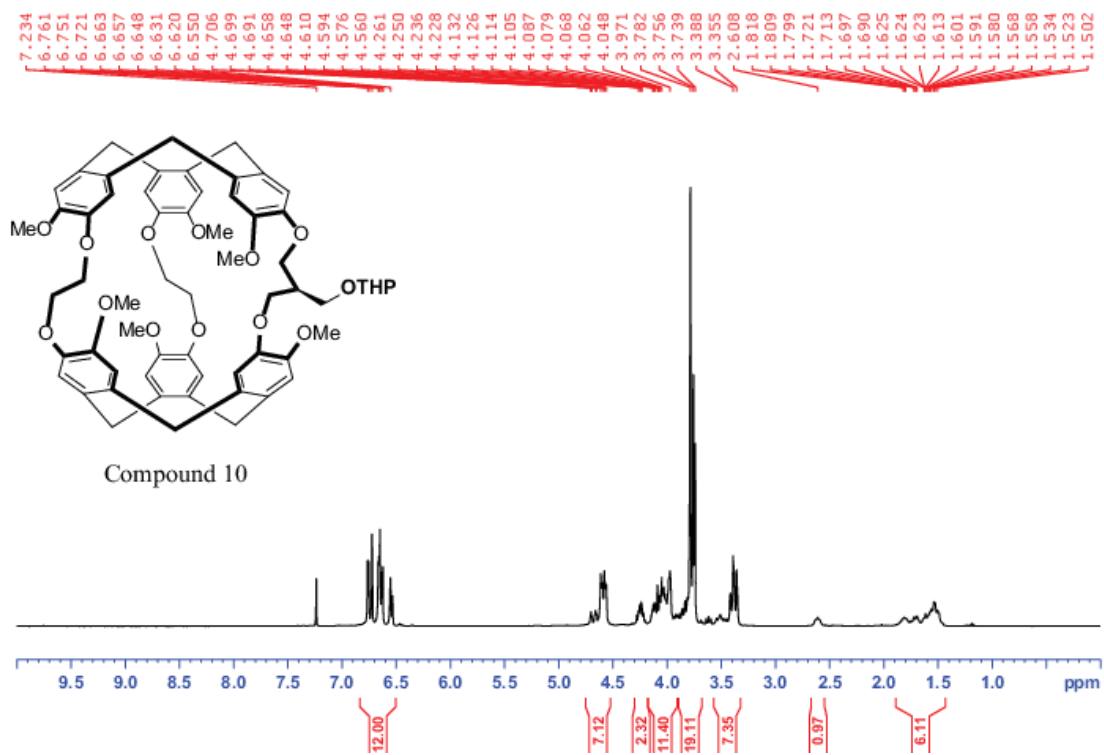

Figure S11: <sup>1</sup>H NMR (400 MHz) spectrum of compound **10** recorded in CDCl<sub>3</sub> at 298 K.

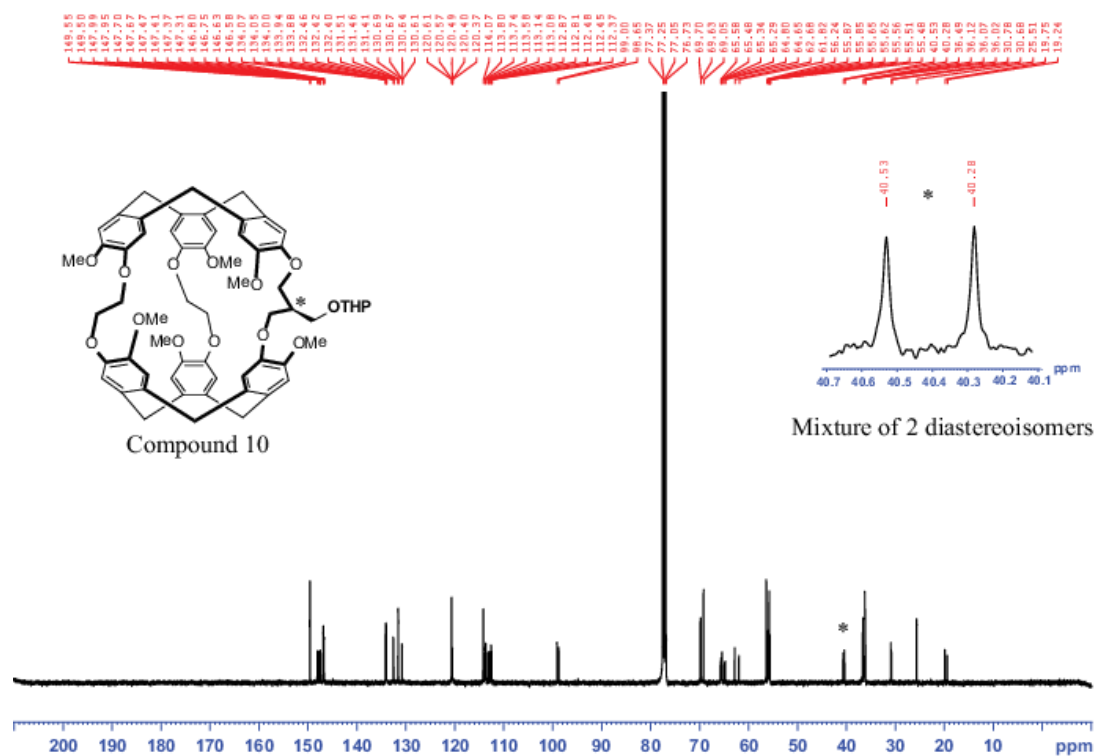

Figure S12:  $^{13}\text{C}$  NMR (100.6 MHz) spectrum of compound **10** recorded in  $\text{CDCl}_3$  at 298 K.

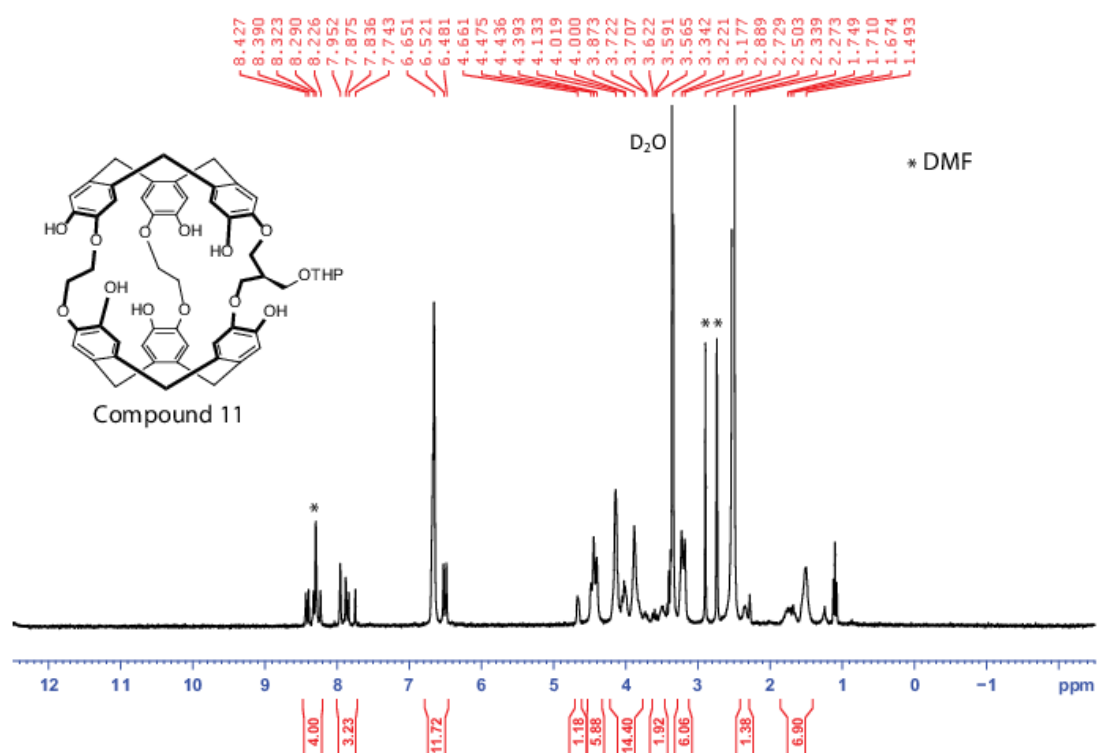

Figure S13:  $^1\text{H}$  NMR (400 MHz) spectrum of compound **11** recorded in  $\text{DMSO}-d_6$  at 298 K.



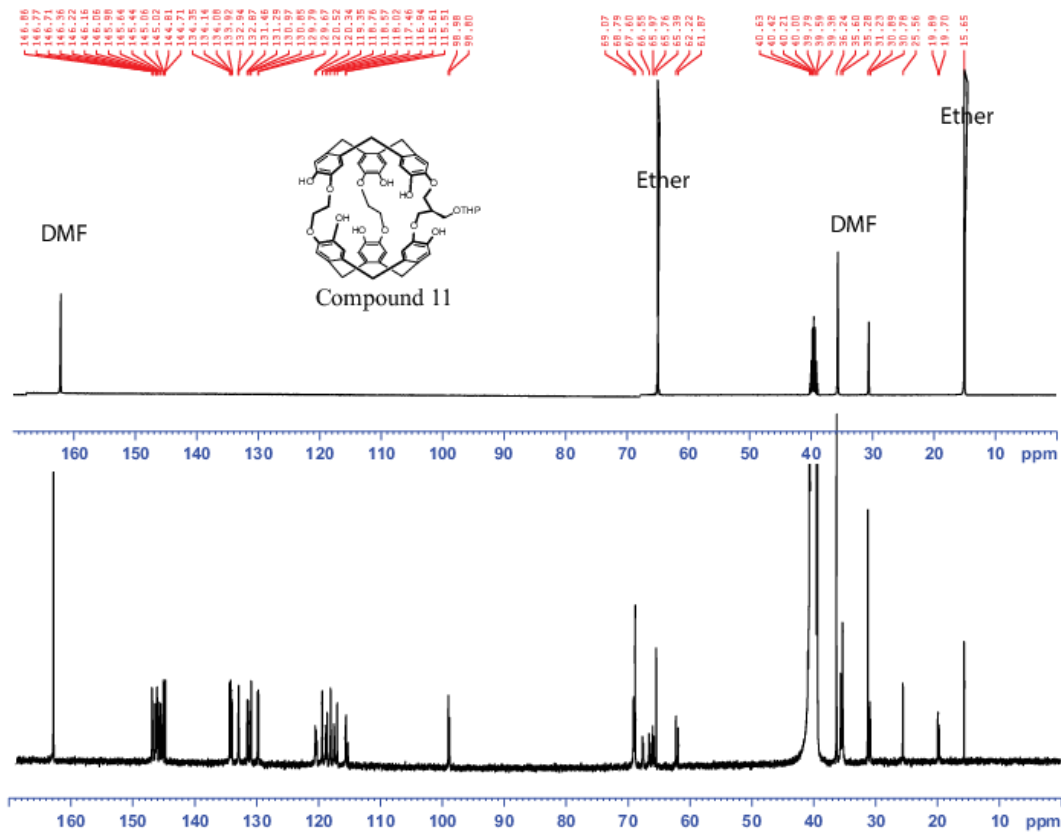

Figure S14:  $^{13}\text{C}$  NMR (100.6 MHz) spectrum of compound **11** recorded in DMSO- $d_6$  at 298K.

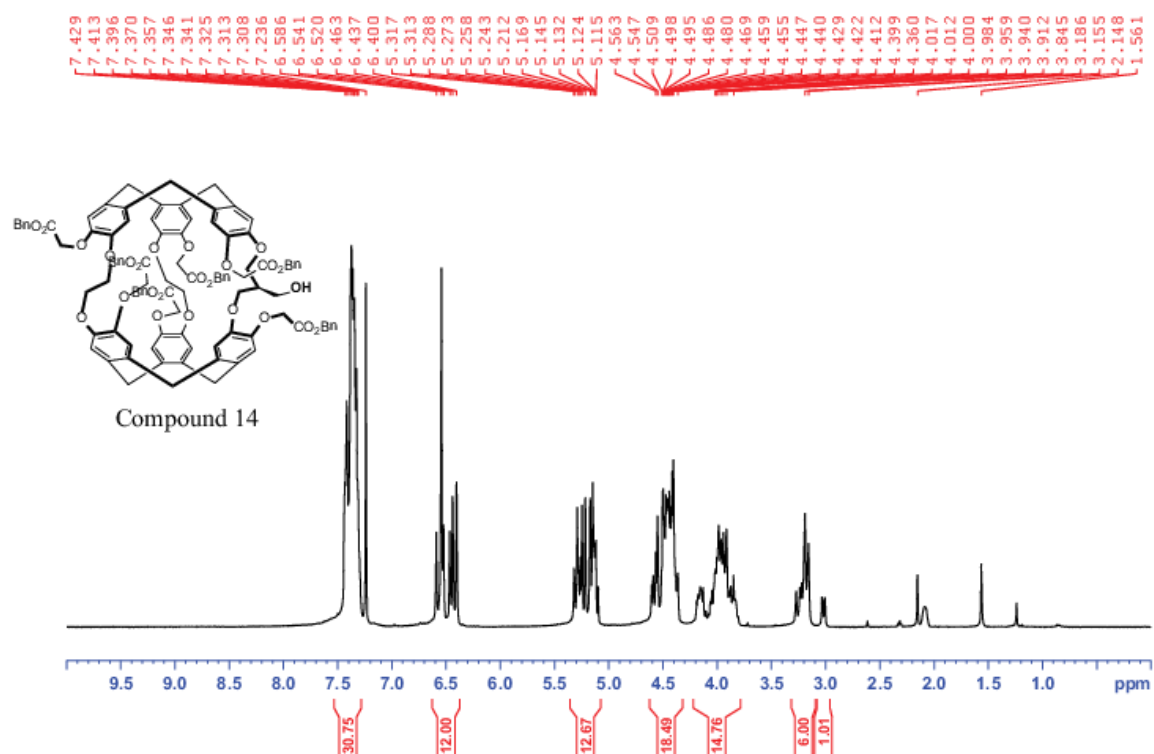

Figure S15: <sup>1</sup>H NMR (400 MHz) spectrum of compound **14** recorded in CDCl<sub>3</sub> at 298 K.

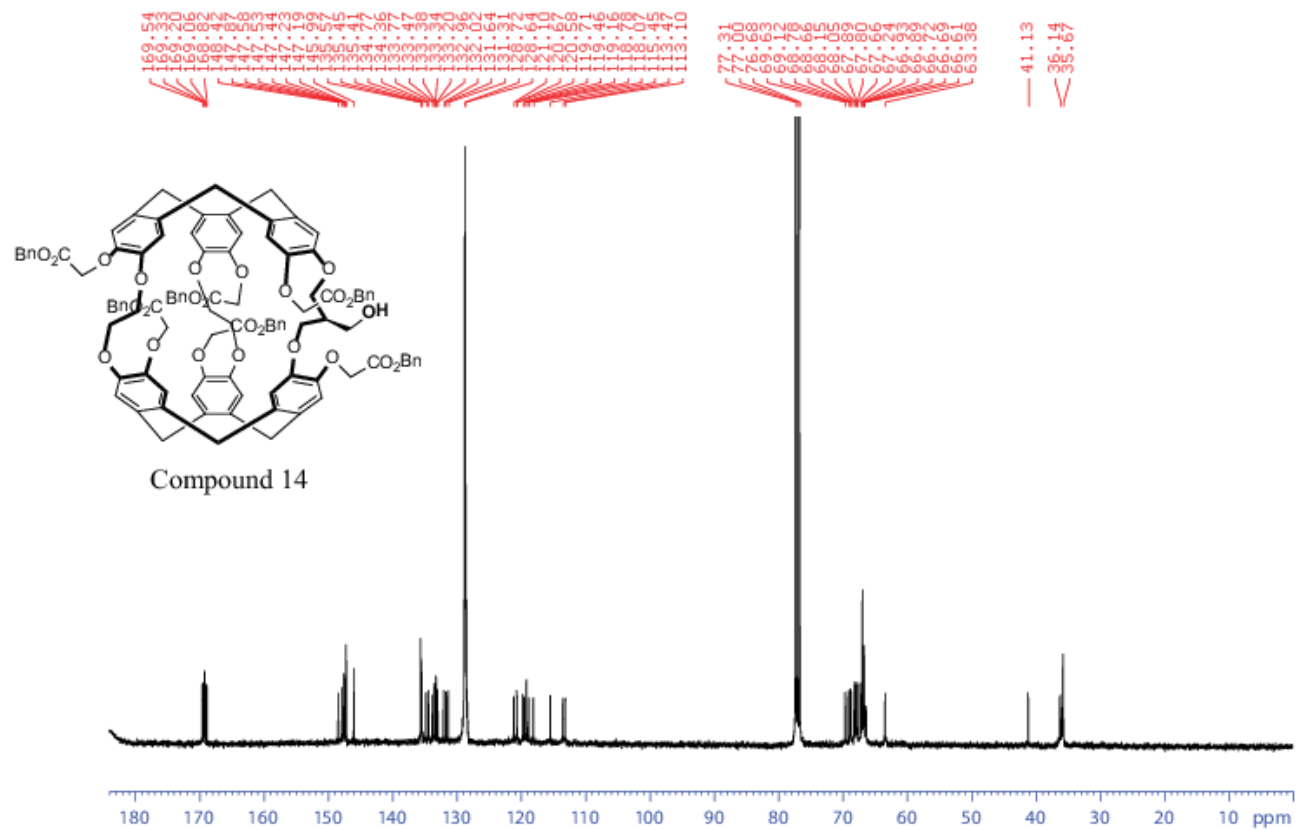

Figure S16:  $^{13}\text{C}$  NMR (100.6 MHz) spectrum of compound **14** recorded in  $\text{CDCl}_3$  at 298 K.

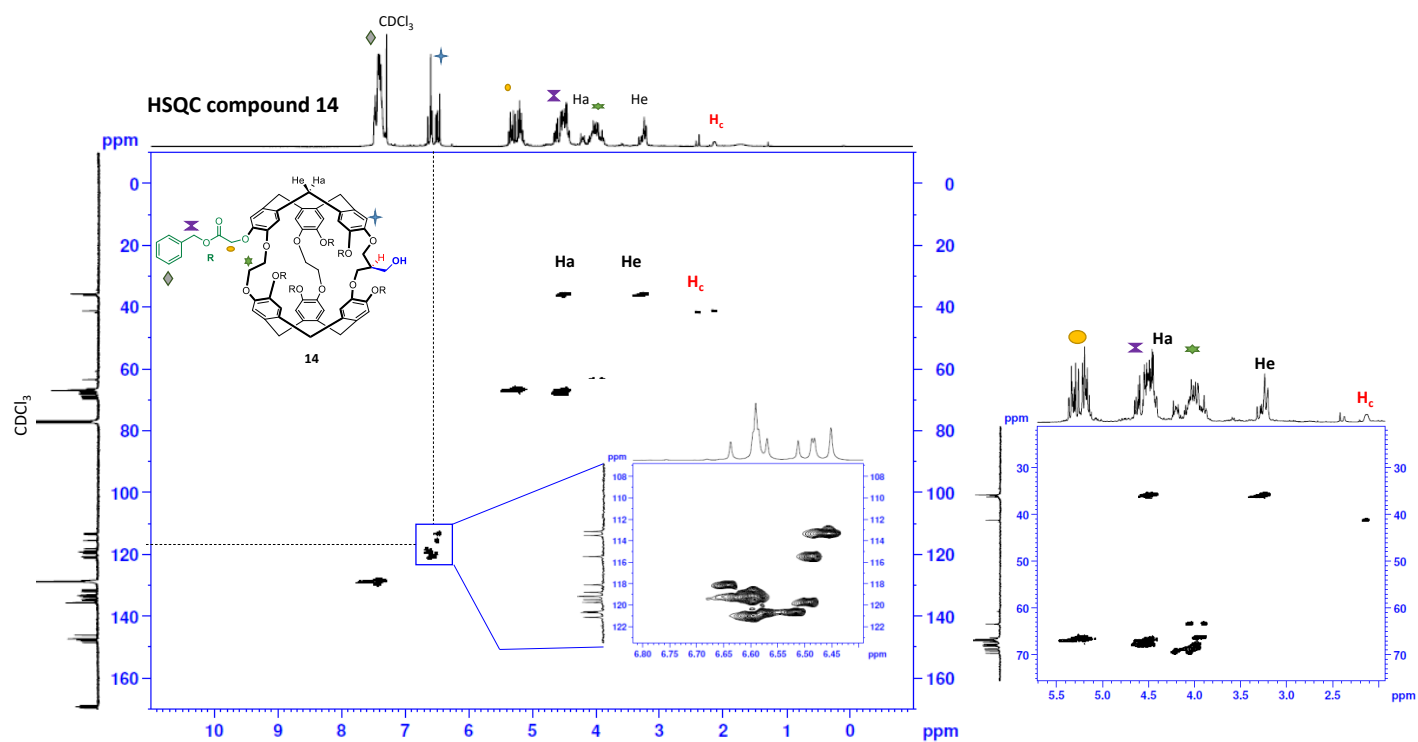

Figure S17: HSQC (400 MHz) spectrum of compound **14** recorded in  $\text{CDCl}_3$  at 298 K.



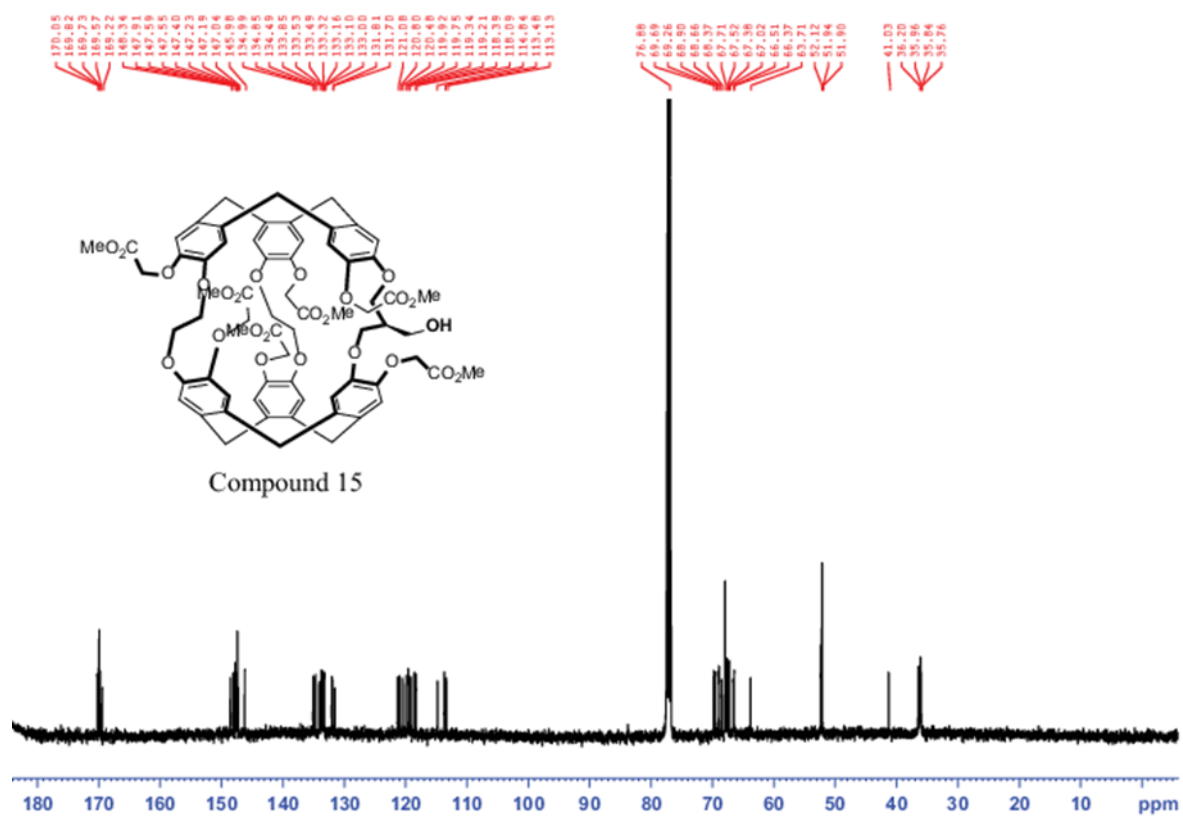

Figure S19:  $^{13}\text{C}$  NMR (100.6 MHz) spectrum of compound **15** recorded in  $\text{CDCl}_3$  at 298 K.

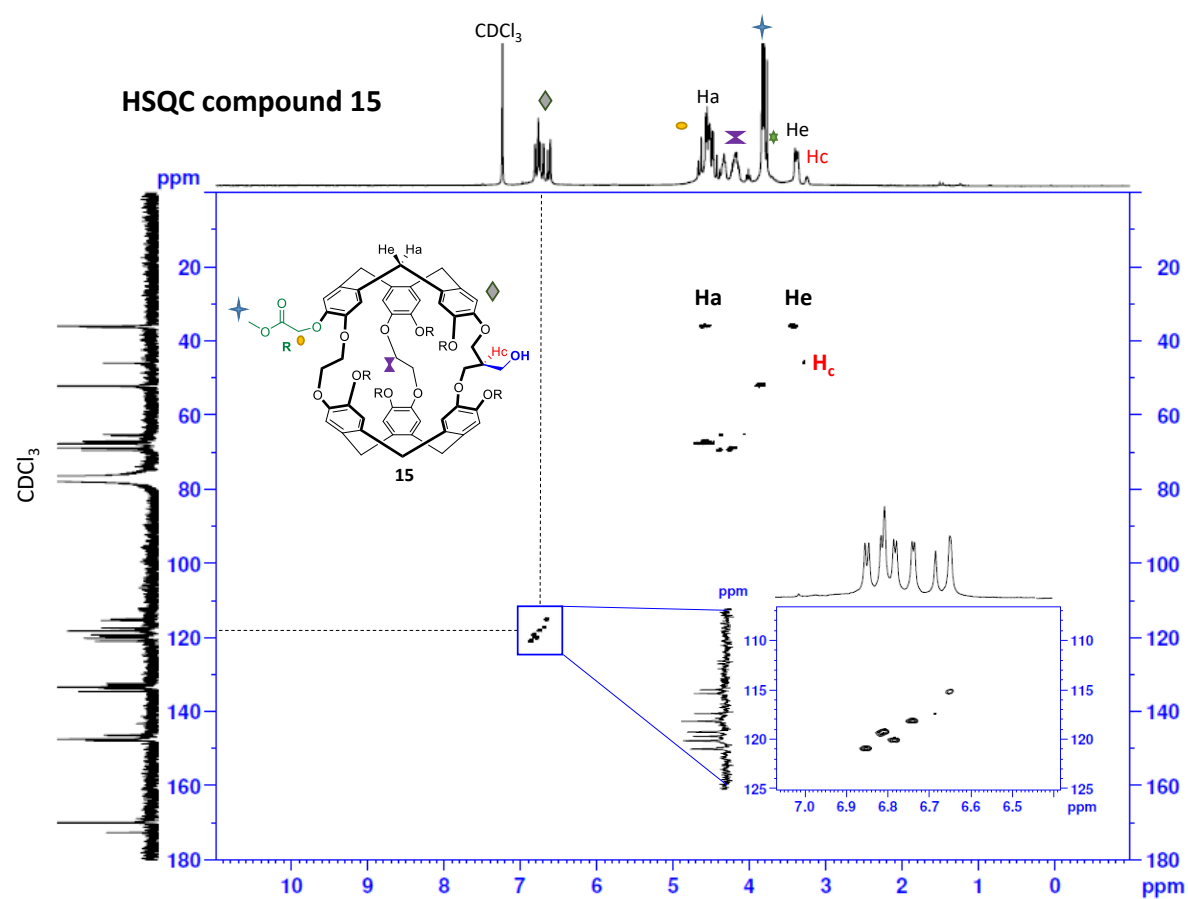

Figure S20: HSQC (400 MHz) spectrum of compound **15** recorded in CDCl<sub>3</sub> at 298 K.

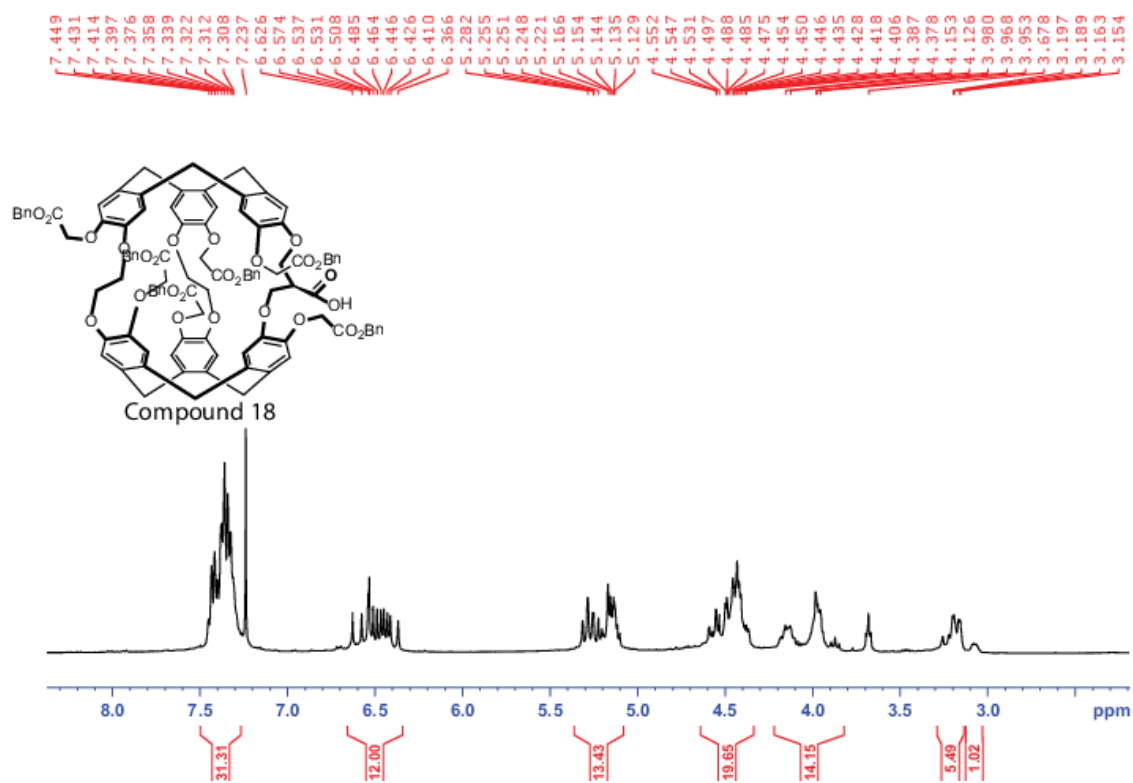

Figure S21:  $^1\text{H}$  NMR (400 MHz) spectrum of compound **18** recorded in  $\text{CDCl}_3$  at 298 K.



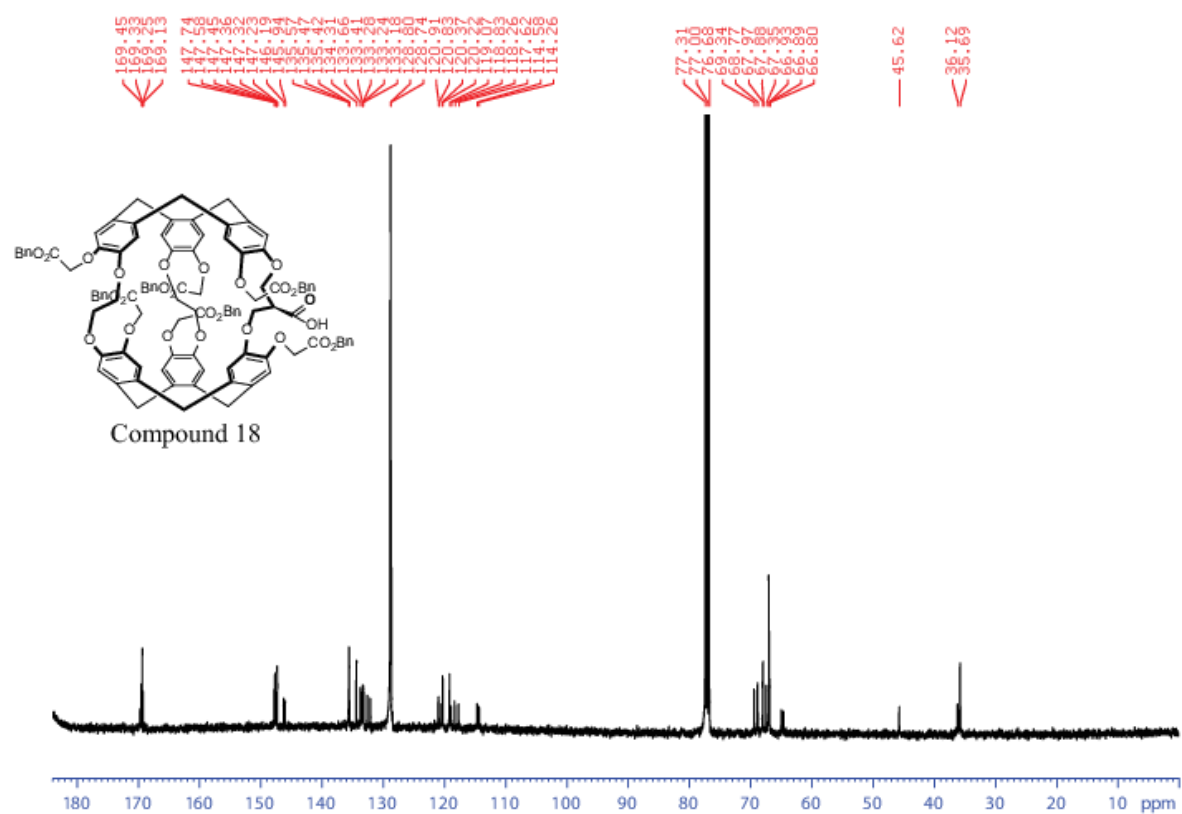

Figure S22:  $^{13}\text{C}$  NMR (100.6 MHz) spectrum of compound **18** recorded in CDCl<sub>3</sub> at 298 K.

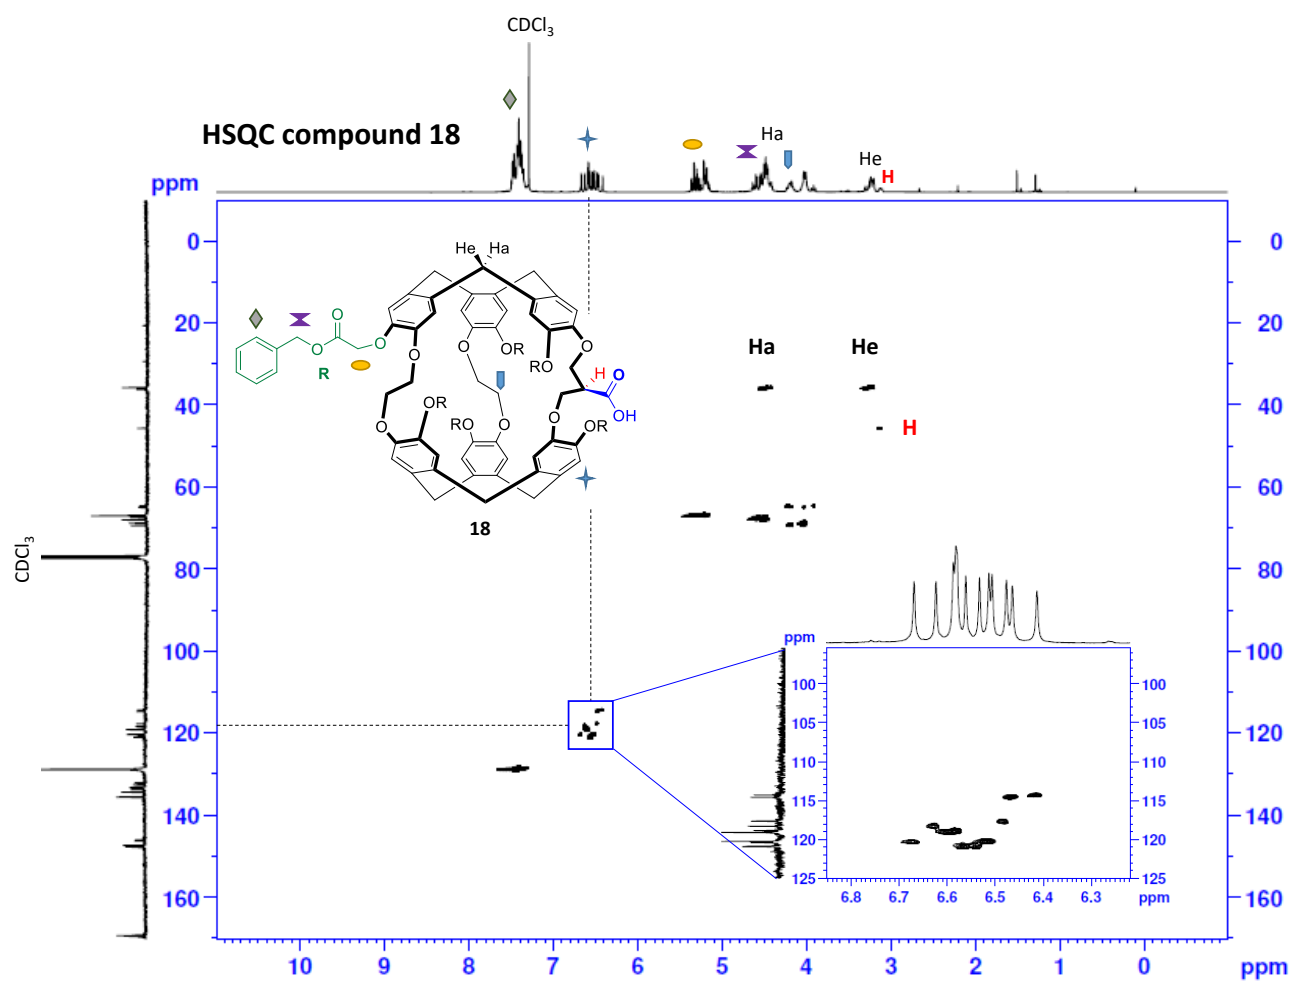

Figure S23: HSQC (400 MHz) spectrum of compound **18** recorded in CDCl<sub>3</sub> at 298 K.

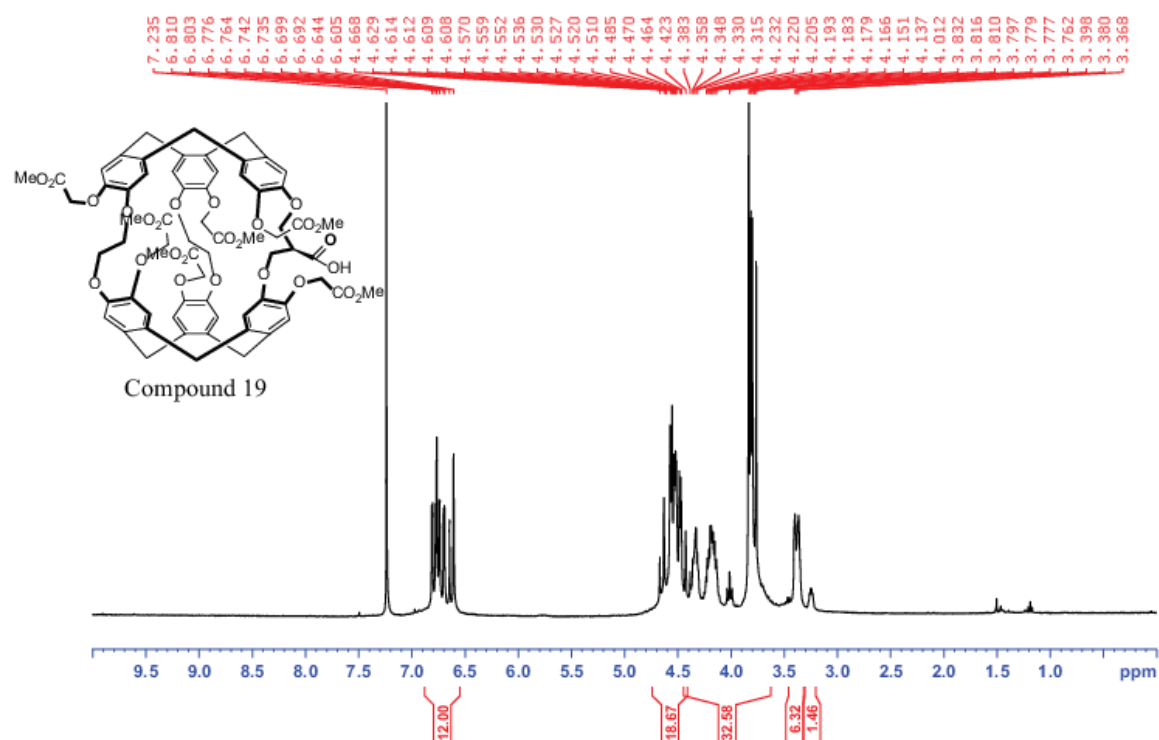

Figure S24:  $^1\text{H}$  NMR (400 MHz) spectrum of compound **19** recorded in  $\text{CDCl}_3$  at 298 K.

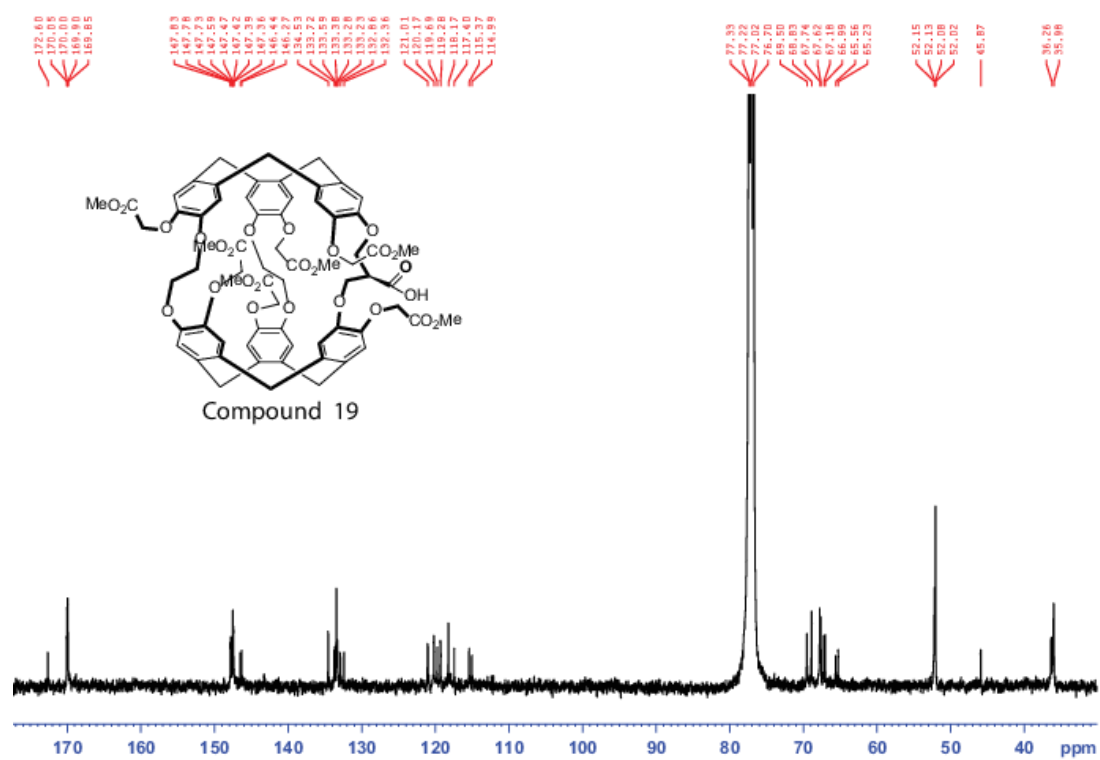

Figure S25:  $^{13}\text{C}$  NMR (100.6 MHz) spectrum of compound **19** recorded in  $\text{CDCl}_3$  at 298 K.

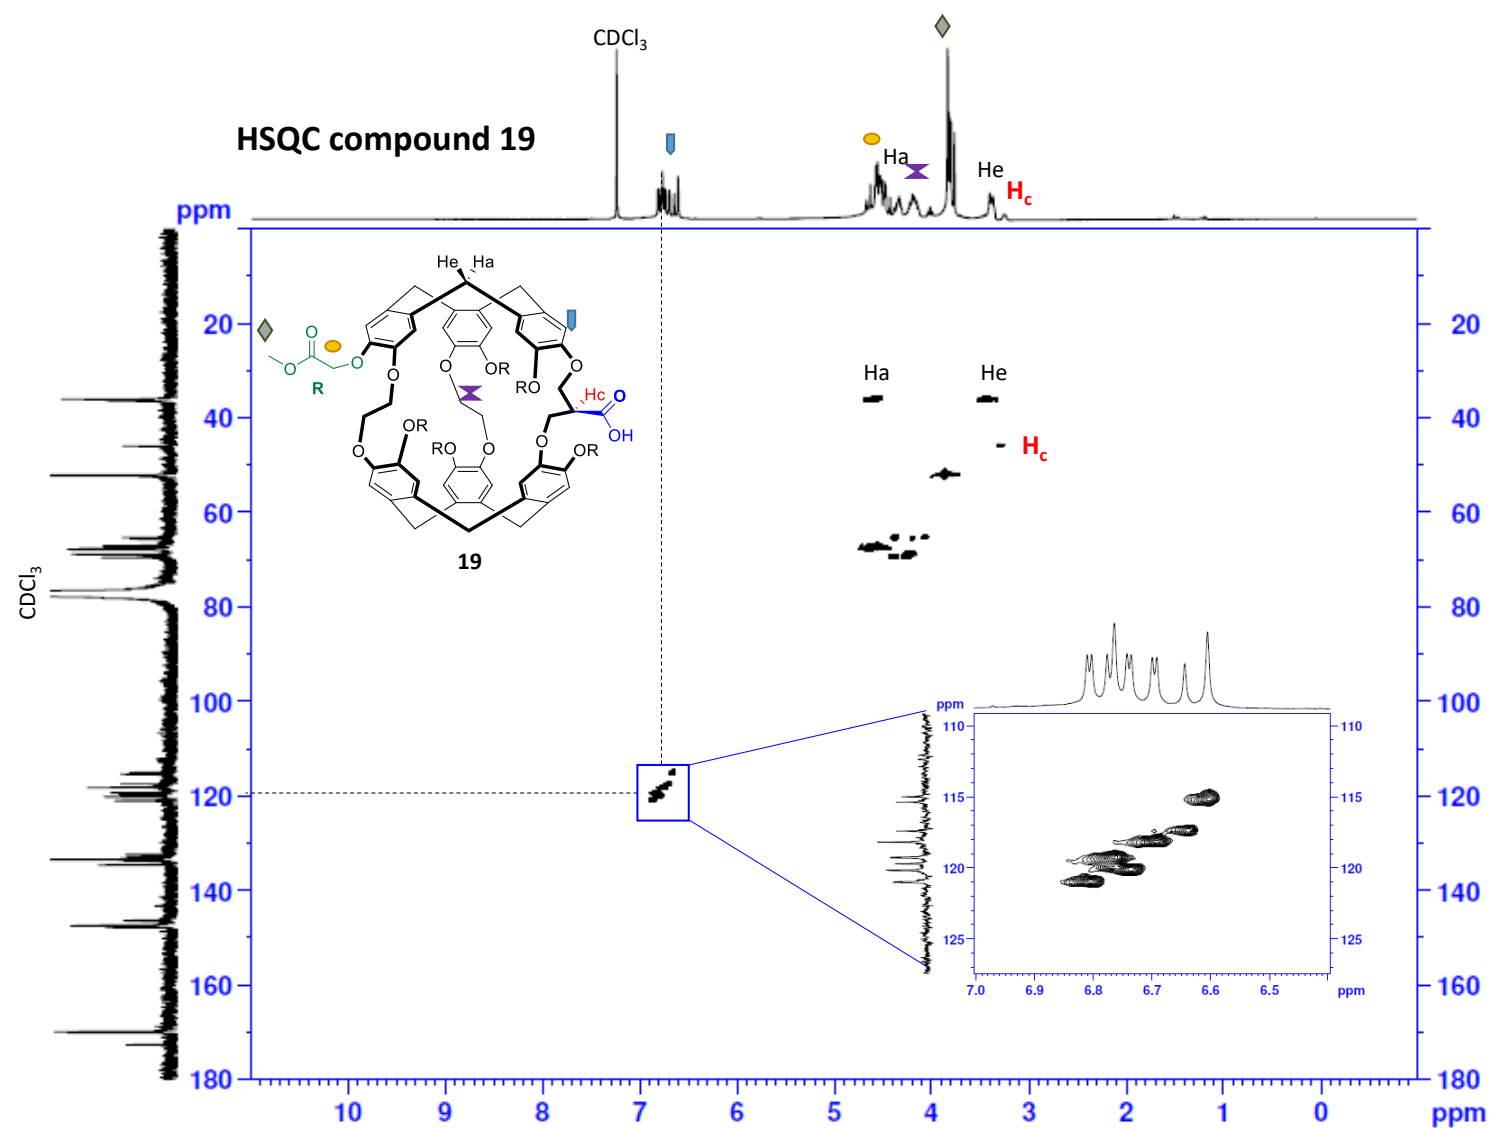

Figure S26: HSQC (400 MHz) spectrum of compound **19** recorded in CDCl<sub>3</sub> at 298 K.

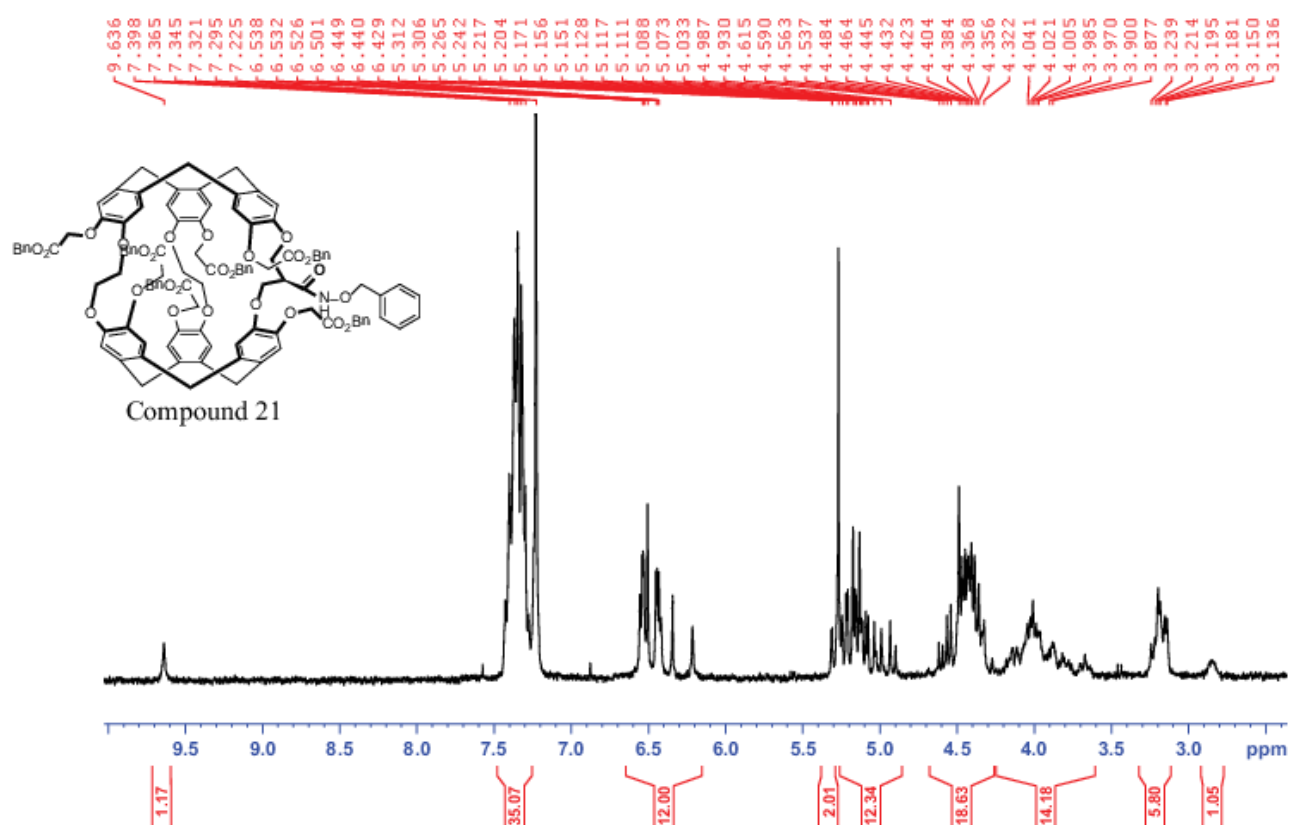

Figure S27:  $^1\text{H}$  NMR (400 MHz) spectrum of compound **21** recorded in  $\text{CDCl}_3$  at 298 K.



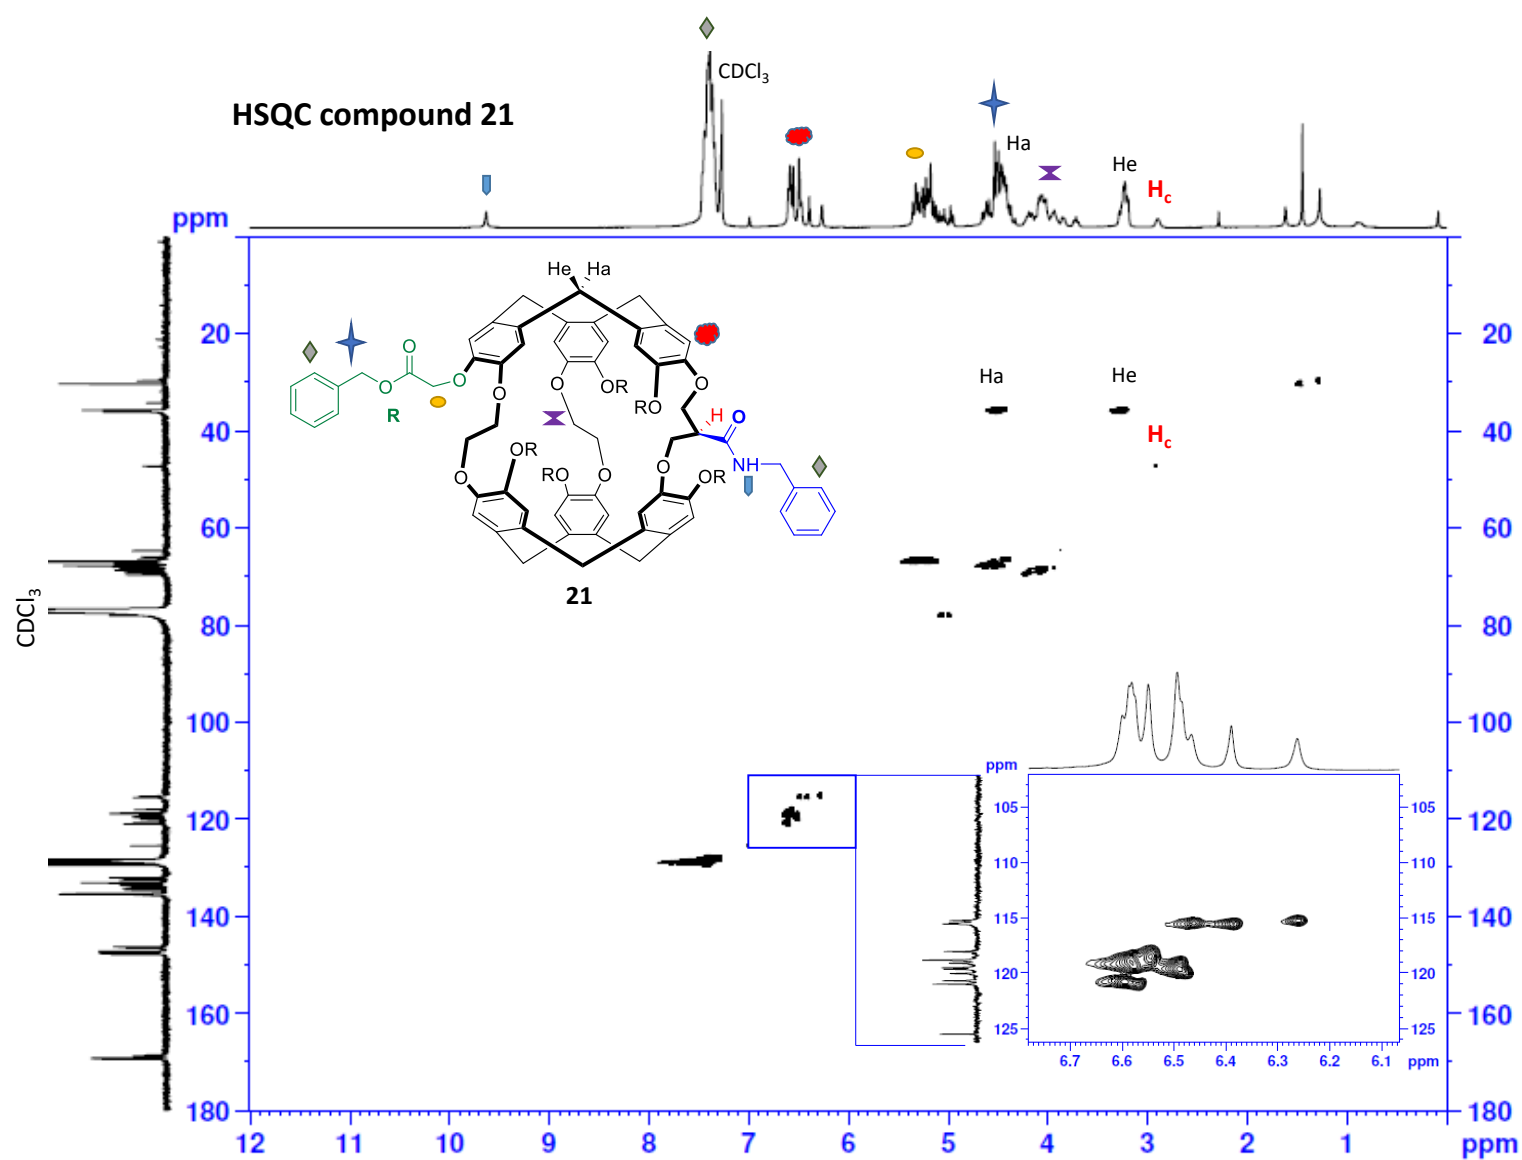

Figure S29: HSQC (400 MHz) spectrum of compound **21** recorded in CDCl<sub>3</sub> at 298 K.



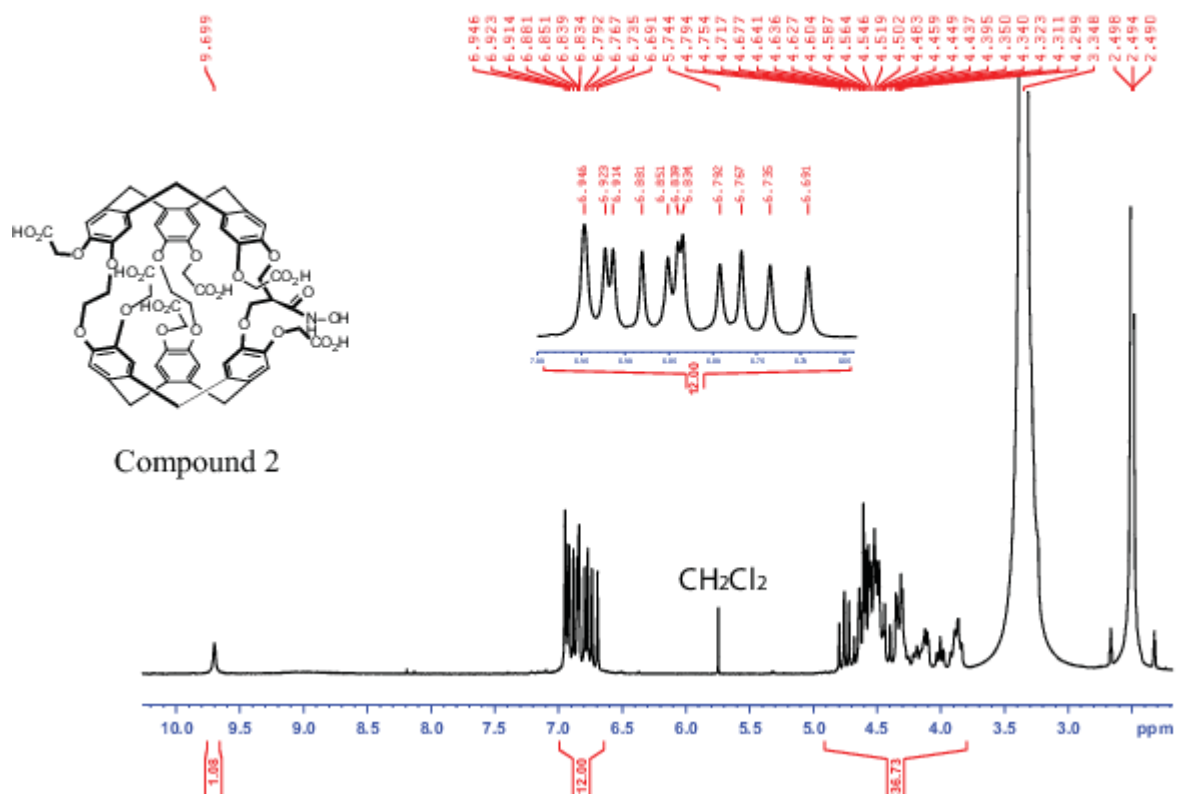

Figure S30: <sup>1</sup>H NMR (400 MHz) spectrum of compound **2** recorded in DMSO-*d*<sub>6</sub> at 298 K.



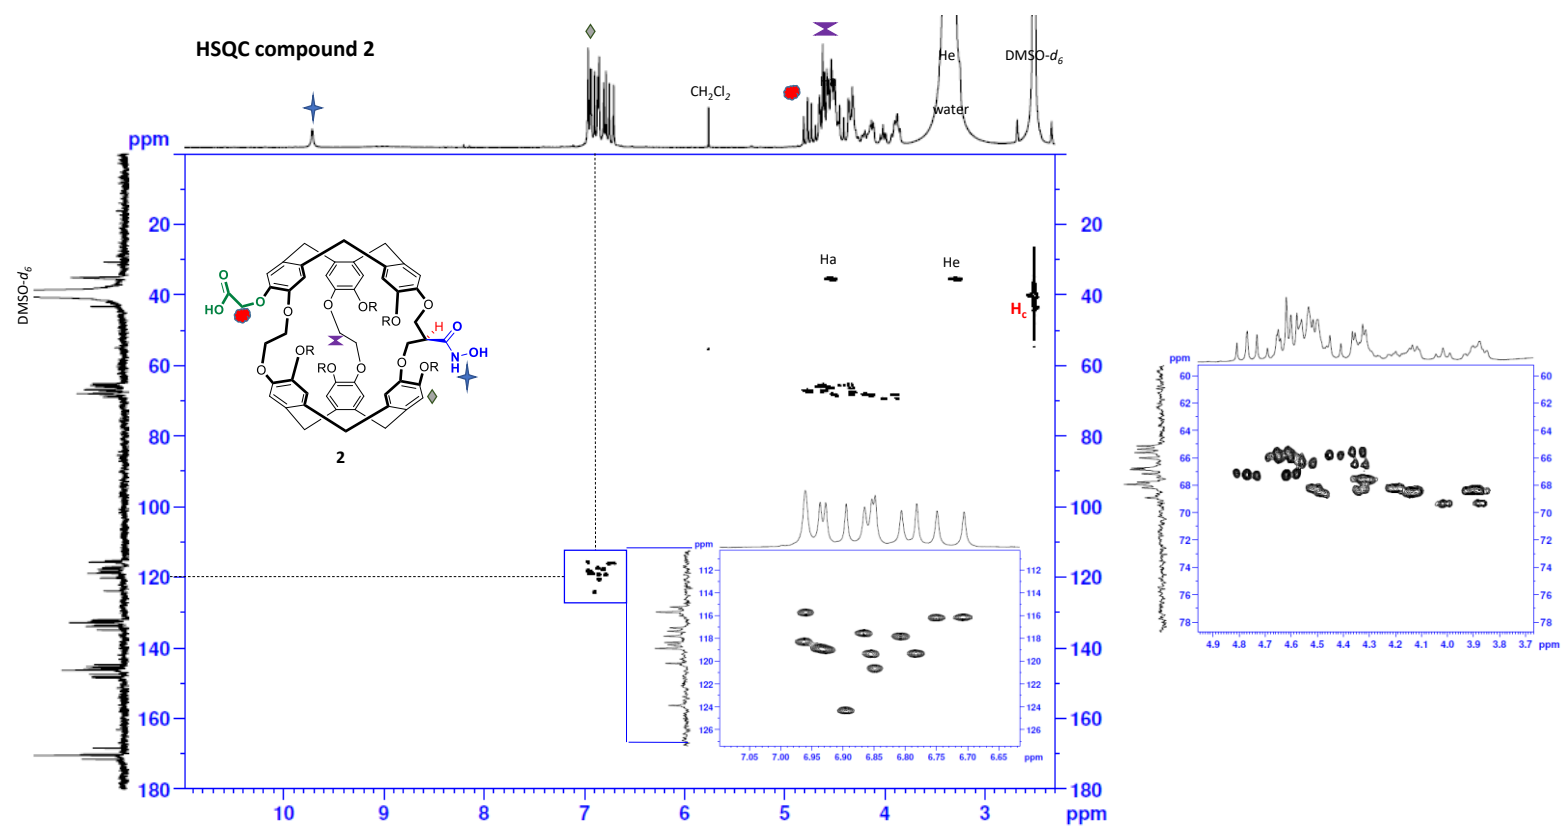

Figure S32: HSQC (400 MHz) spectrum of compound **2** recorded in DMSO-*d*<sub>6</sub> at 298 K.

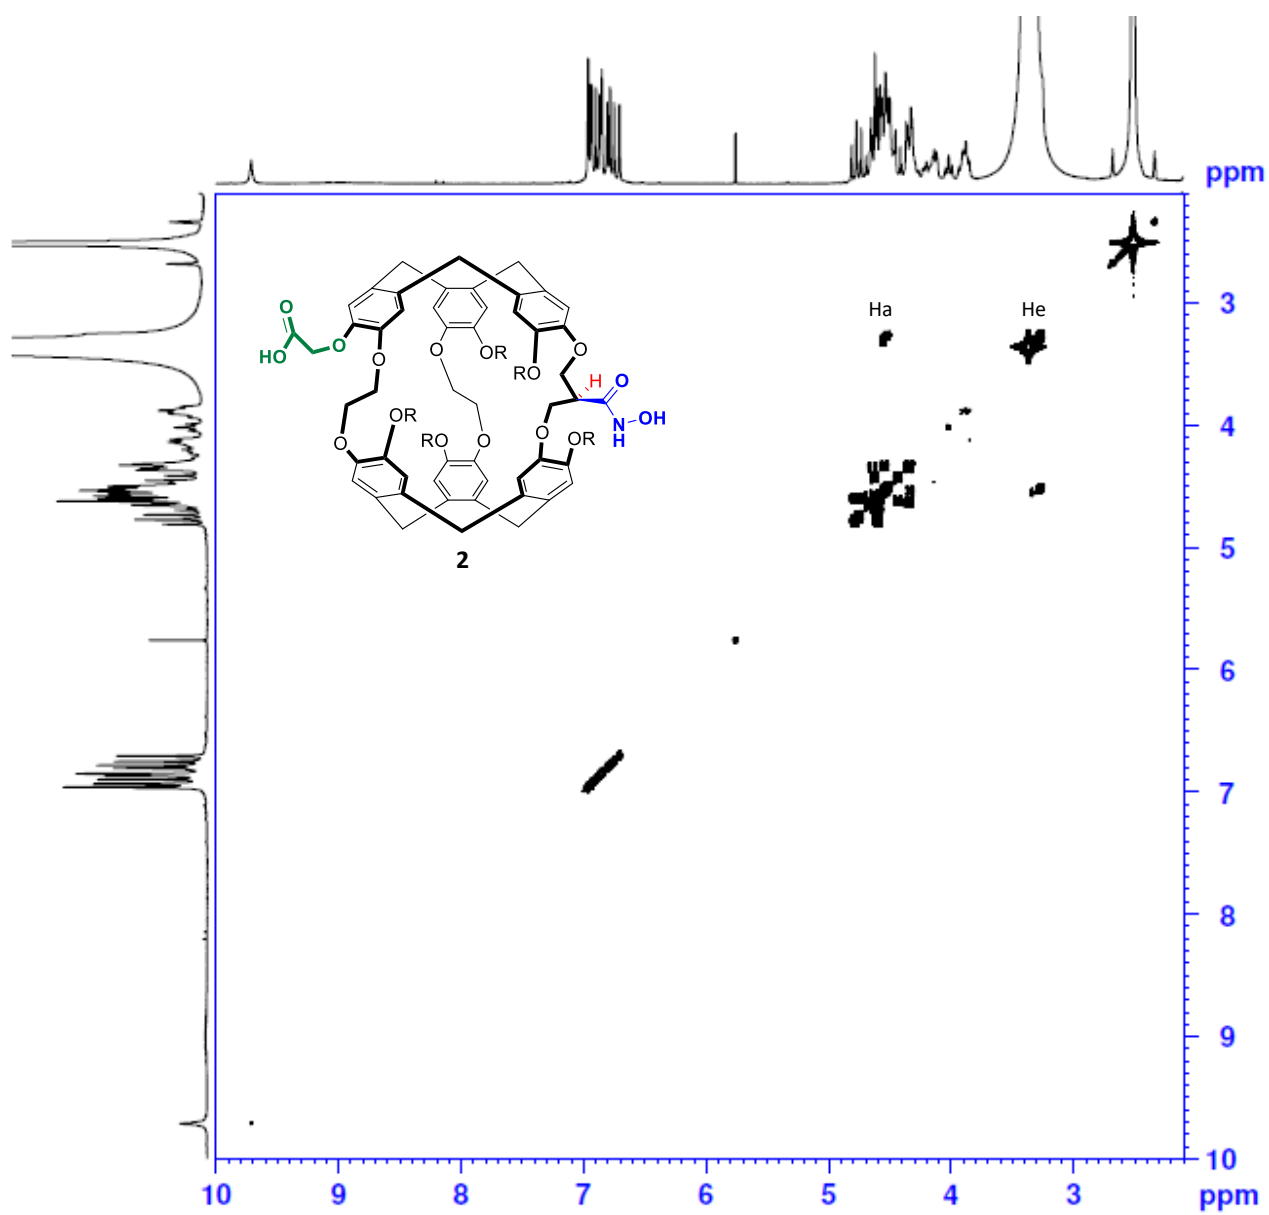

Figure S33: COSY (400 MHz) spectrum of compound **2** recorded in  $\text{DMSO-}d_6$  at 298 K.







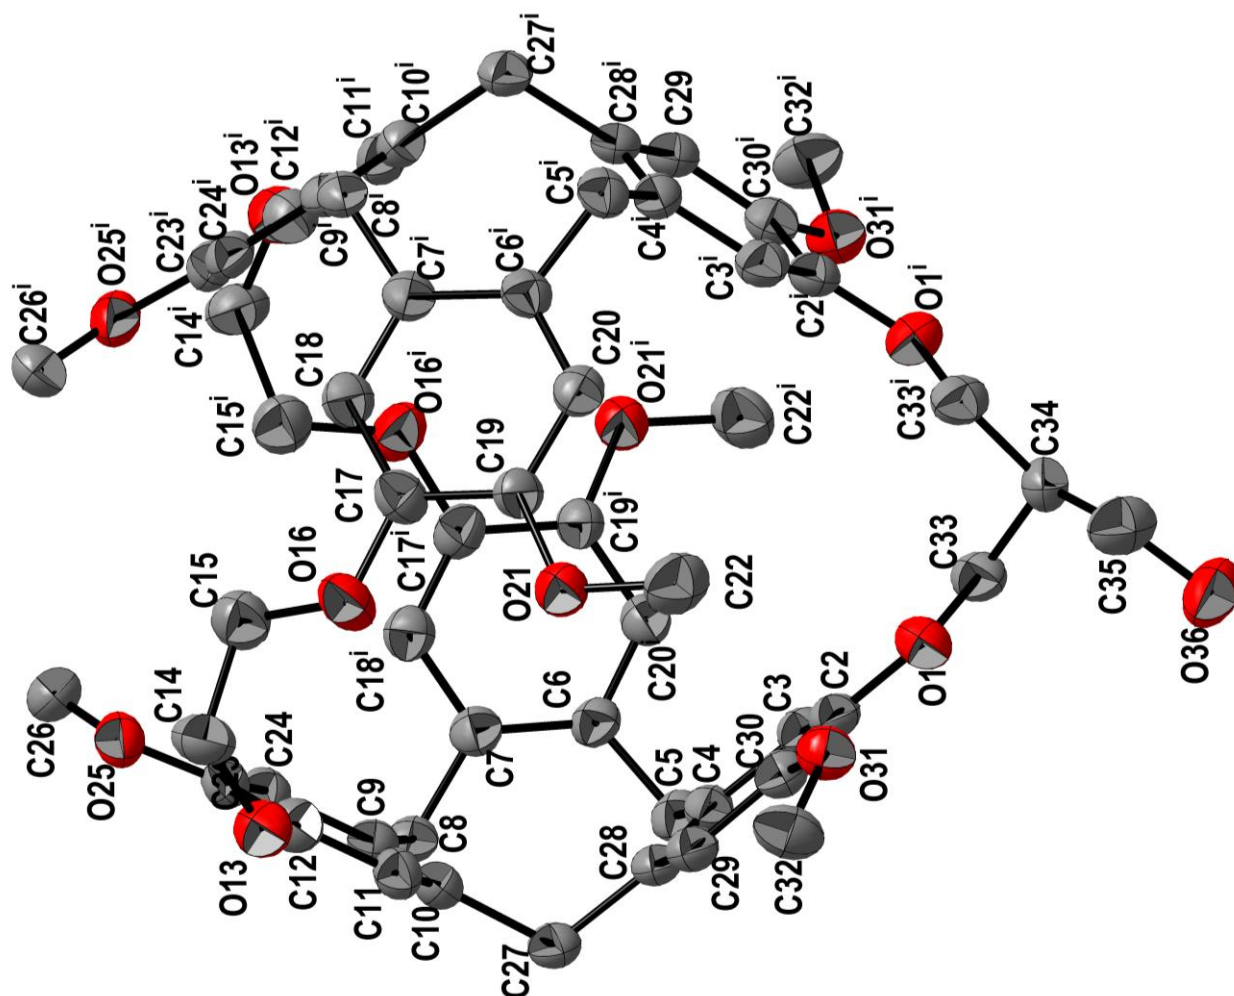

Figure S37: ORTEP representation of compound **9** (hydrogen atoms and solvent molecule were omitted for clarity. The displacement ellipsoids were plotted at 30% probability level).



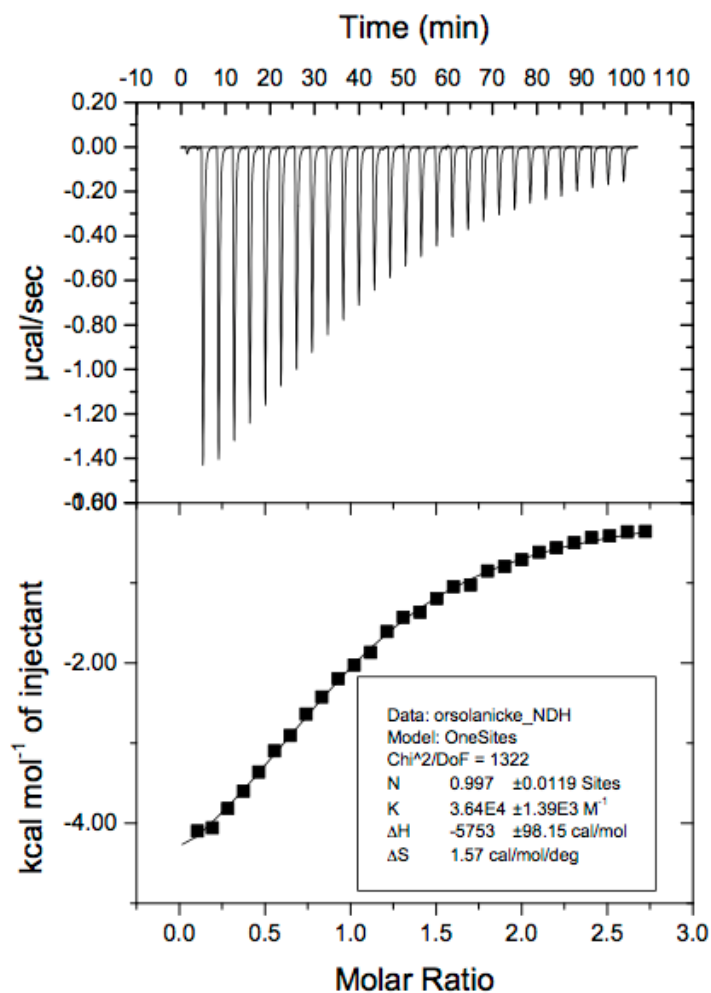

Figure S38: Calorimetric titration of compound **2** in H<sub>2</sub>O/TRIS (20 mM; pH = 7.6). The solution host ( $c = 0.08$  mM) was placed into the calorimeter cell (1.4 mL) and 28 successive aliquots (10  $\mu$ L) of Ni<sup>2+</sup> solution ( $c = 1.0$  mM) were added at 3 min intervals.

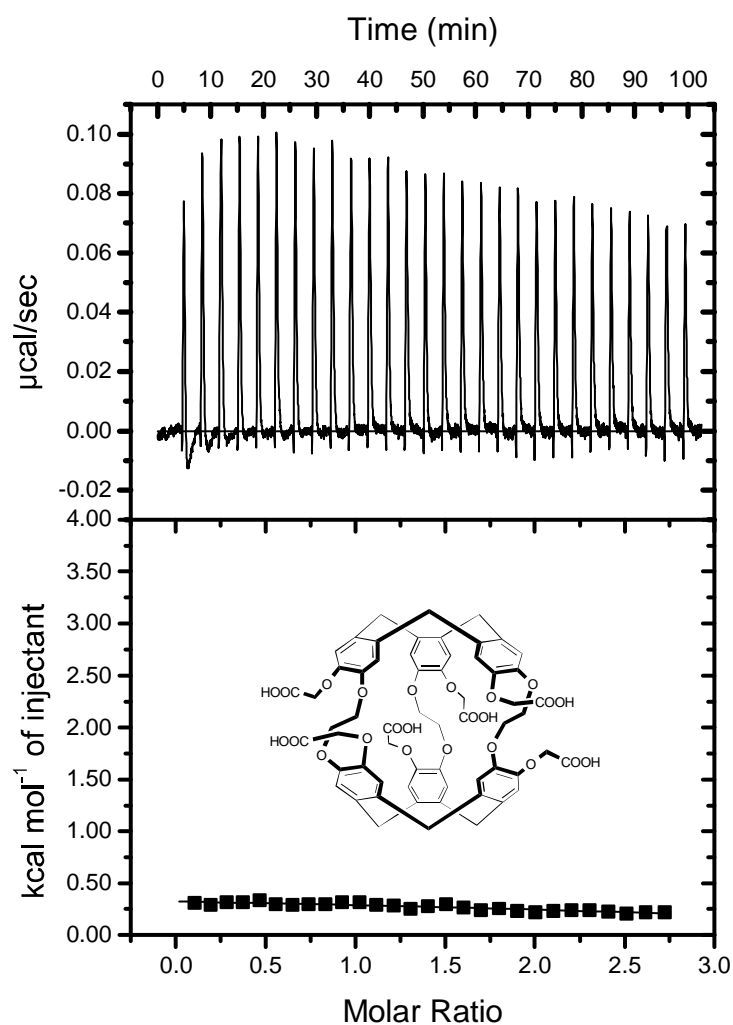

Figure S39: Calorimetric titration of Cryptophane-222 hexacarboxylate in H<sub>2</sub>O/TRIS (20 mM; pH = 7.0). The solution host ( $c = 0.08$  mM) was placed into the calorimeter cell (1.4 mL) and 28 successive aliquots (10  $\mu$ L) of Zn<sup>2+</sup> solution ( $c = 1.0$  mM) were added at 3 min intervals.

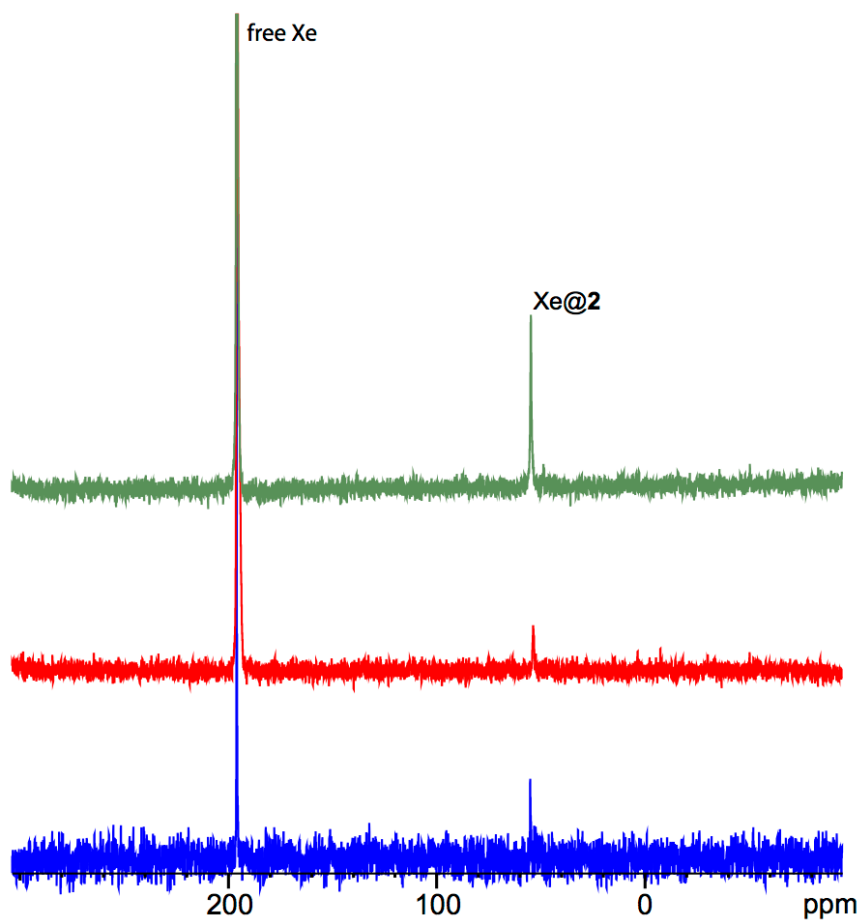

Figure S40: Hyperpolarized  $^{129}\text{Xe}$  spectra (1 scann) of compound **2** in TRIS buffer (20 mM, pH = 7.5). a) in absence of  $\text{Zn}^{2+}$  (green spectrum). b) in presence of 1.0 equiv. of  $\text{Zn}^{2+}$  (blue spectrum). c) in presence of 5.0 equiv. of  $\text{Zn}^{2+}$  (red spectrum). Spectra recorded at 25°C. 0.39 mg of **1** in 1000  $\mu\text{L}$  of TRIS buffer (20 mM)/10%  $\text{D}_2\text{O}$  pH 7.5 ( $c = 0.32$  mM).

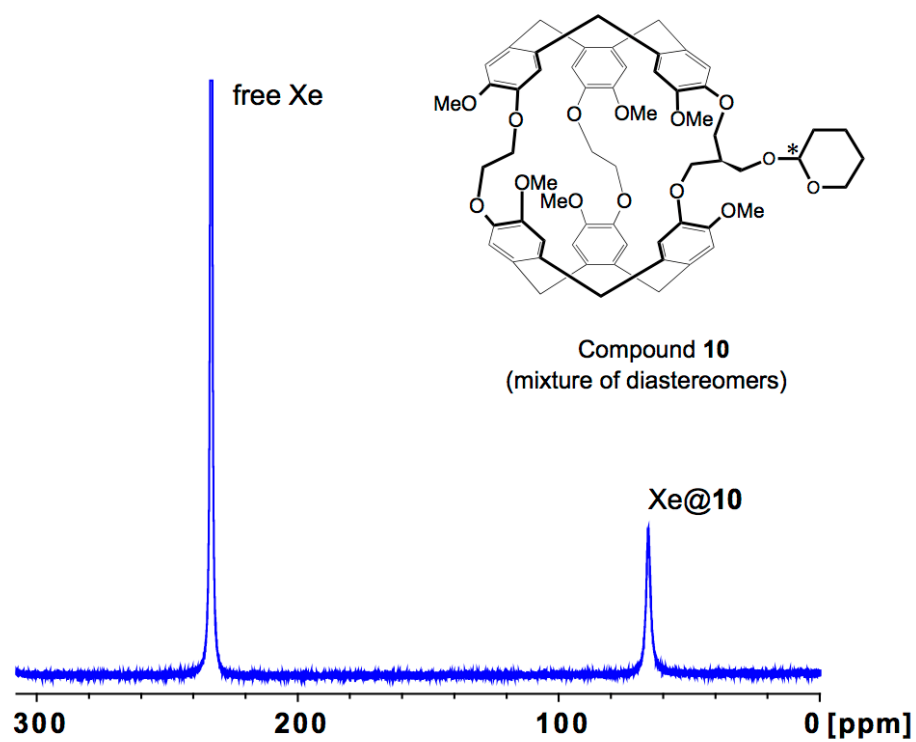

Figure S41: hyperpolarized  $^{129}\text{Xe}$  NMR spectrum of compound **10** recorded at 298 K in  $\text{C}_2\text{D}_2\text{Cl}_4$ . 1.8 mg of cryptophane **10** in 600  $\mu\text{L}$  of 1,1,2,2-tetrachloroethane- $d_2$ .

### Crystal data

|                                |                                                         |
|--------------------------------|---------------------------------------------------------|
| $C_{56}H_{58}O_{13}$           | $D_x = 0.987 \text{ Mg m}^{-3}$                         |
| $M_r = 939.07$                 | Cu $K\alpha$ radiation, $\lambda = 1.54184 \text{ \AA}$ |
| Cubic, $I2_13$                 | Cell parameters from 3819 reflections                   |
| Hall symbol: I 2b 2c 3         | $q = 3.2\text{--}66.9^\circ$                            |
| $a = 33.5971 (16) \text{ \AA}$ | $m = 0.57 \text{ mm}^{-1}$                              |
| $V = 37923 (5) \text{ \AA}^3$  | $T = 150 \text{ K}$                                     |
| $Z = 24$                       | Plate, colorless                                        |
| $F(000) = 11952$               | $0.40 \times 0.32 \times 0.19 \text{ mm}$               |

### Data collection

|                                                                                                                                                                                                                                                                                                                                                                                                                              |                                                              |
|------------------------------------------------------------------------------------------------------------------------------------------------------------------------------------------------------------------------------------------------------------------------------------------------------------------------------------------------------------------------------------------------------------------------------|--------------------------------------------------------------|
| Xcalibur, Atlas, Gemini ultra diffractometer                                                                                                                                                                                                                                                                                                                                                                                 | 10442 independent reflections                                |
| Radiation source: fine-focus sealed X-ray tube, Enhance Ultra (Cu) X-ray Source                                                                                                                                                                                                                                                                                                                                              | 6339 reflections with $I > 2.0\sigma(I)$                     |
| Mirror monochromator                                                                                                                                                                                                                                                                                                                                                                                                         | $R_{\text{int}} = 0.069$                                     |
| Detector resolution: $10.4685 \text{ pixels mm}^{-1}$                                                                                                                                                                                                                                                                                                                                                                        | $q_{\text{max}} = 67.0^\circ$ , $q_{\text{min}} = 3.2^\circ$ |
| w scans                                                                                                                                                                                                                                                                                                                                                                                                                      | $h = -38\text{--}28$                                         |
| Absorption correction: analytical <i>CrysAlis PRO</i> 1.171.38.46 (Rigaku Oxford Diffraction, 2015)<br>Analytical numeric absorption correction using a multifaceted crystal model based on expressions derived by R.C. Clark & J.S. Reid. (Clark, R. C. & Reid, J. S. (1995). <i>Acta Cryst. A</i> 51, 887-897) Empirical absorption correction using spherical harmonics, implemented in SCALE3 ABSPACK scaling algorithm. | $k = -40\text{--}10$                                         |
| $T_{\text{min}} = 0.863$ , $T_{\text{max}} = 0.912$                                                                                                                                                                                                                                                                                                                                                                          | $l = -29\text{--}26$                                         |
| 25070 measured reflections                                                                                                                                                                                                                                                                                                                                                                                                   |                                                              |

### Refinement

|                                   |                                                                                                                                                                                                                                                                                                                                                                                                     |
|-----------------------------------|-----------------------------------------------------------------------------------------------------------------------------------------------------------------------------------------------------------------------------------------------------------------------------------------------------------------------------------------------------------------------------------------------------|
| Refinement on $F^2$               | Hydrogen site location: difference Fourier map                                                                                                                                                                                                                                                                                                                                                      |
| Least-squares matrix: full        | H-atom parameters constrained                                                                                                                                                                                                                                                                                                                                                                       |
| $R[F^2 > 2s(F^2)] = 0.078$        | Method, part 1, Chebyshev polynomial, (Watkin, 1994, Prince, 1982) $[\text{weight}] = 1.0/[A_0 \cdot T_0(x) + A_1 \cdot T_1(x) \cdots + A_{n-1} \cdot T_{n-1}(x)]$ where $A_i$ are the Chebyshev coefficients listed below and $x = F/F_{\text{max}}$ Method = Robust Weighting (Prince, 1982) $W = [\text{weight}] \cdot [1 - (\Delta F / 6 \cdot \sigma(F))^2]$<br>$A_i$ are: 347. 529. 246. 53.0 |
| $wR(F^2) = 0.189$                 | $(D/s)_{\text{max}} = 0.003$                                                                                                                                                                                                                                                                                                                                                                        |
| $S = 1.00$                        | $D\rho_{\text{max}} = 0.53 \text{ e \AA}^{-3}$                                                                                                                                                                                                                                                                                                                                                      |
| 645 parameters                    | Absolute structure: Parsons, Flack & Wagner (2013), 3517 Friedel Pairs                                                                                                                                                                                                                                                                                                                              |
| 60 restraints                     | Absolute structure parameter: 0.473 (13)                                                                                                                                                                                                                                                                                                                                                            |
| Primary atom site location: other |                                                                                                                                                                                                                                                                                                                                                                                                     |

Table S1: Crystallographic data of cryptophane **9**.
